# Supplementary figures and images for: Lewis acid-promoted [2 + 2] cycloadditions of alkenes with aryl ketenes
Source: Royal Society of Chemistry journal article supplement (doi:10.1039/c5ob01837d), 2015-09-30

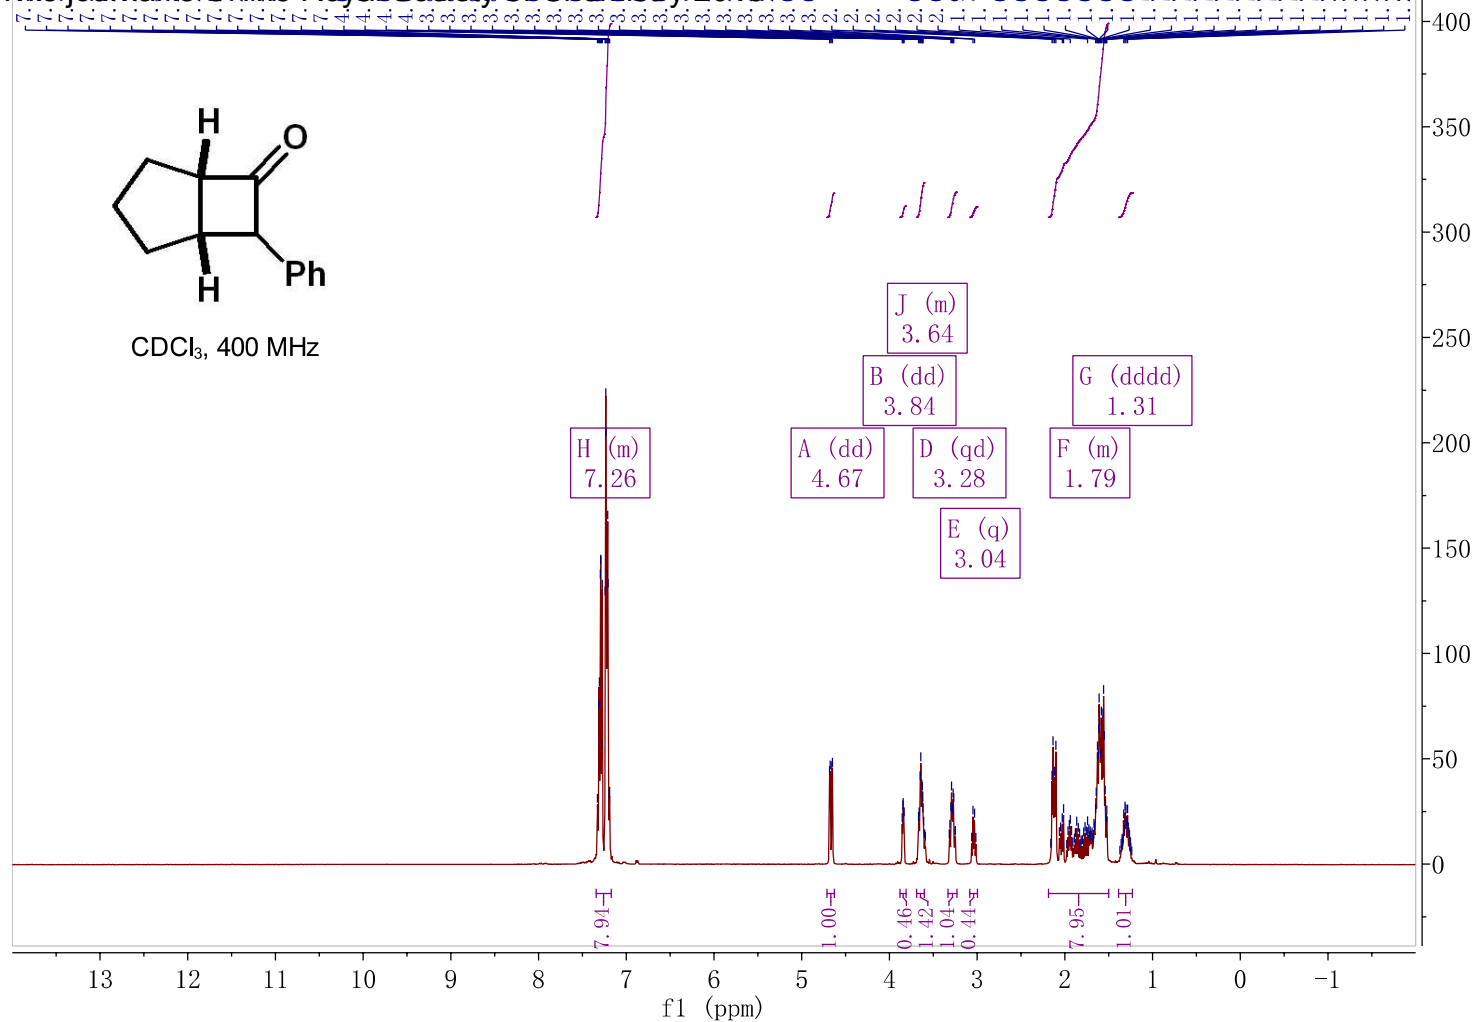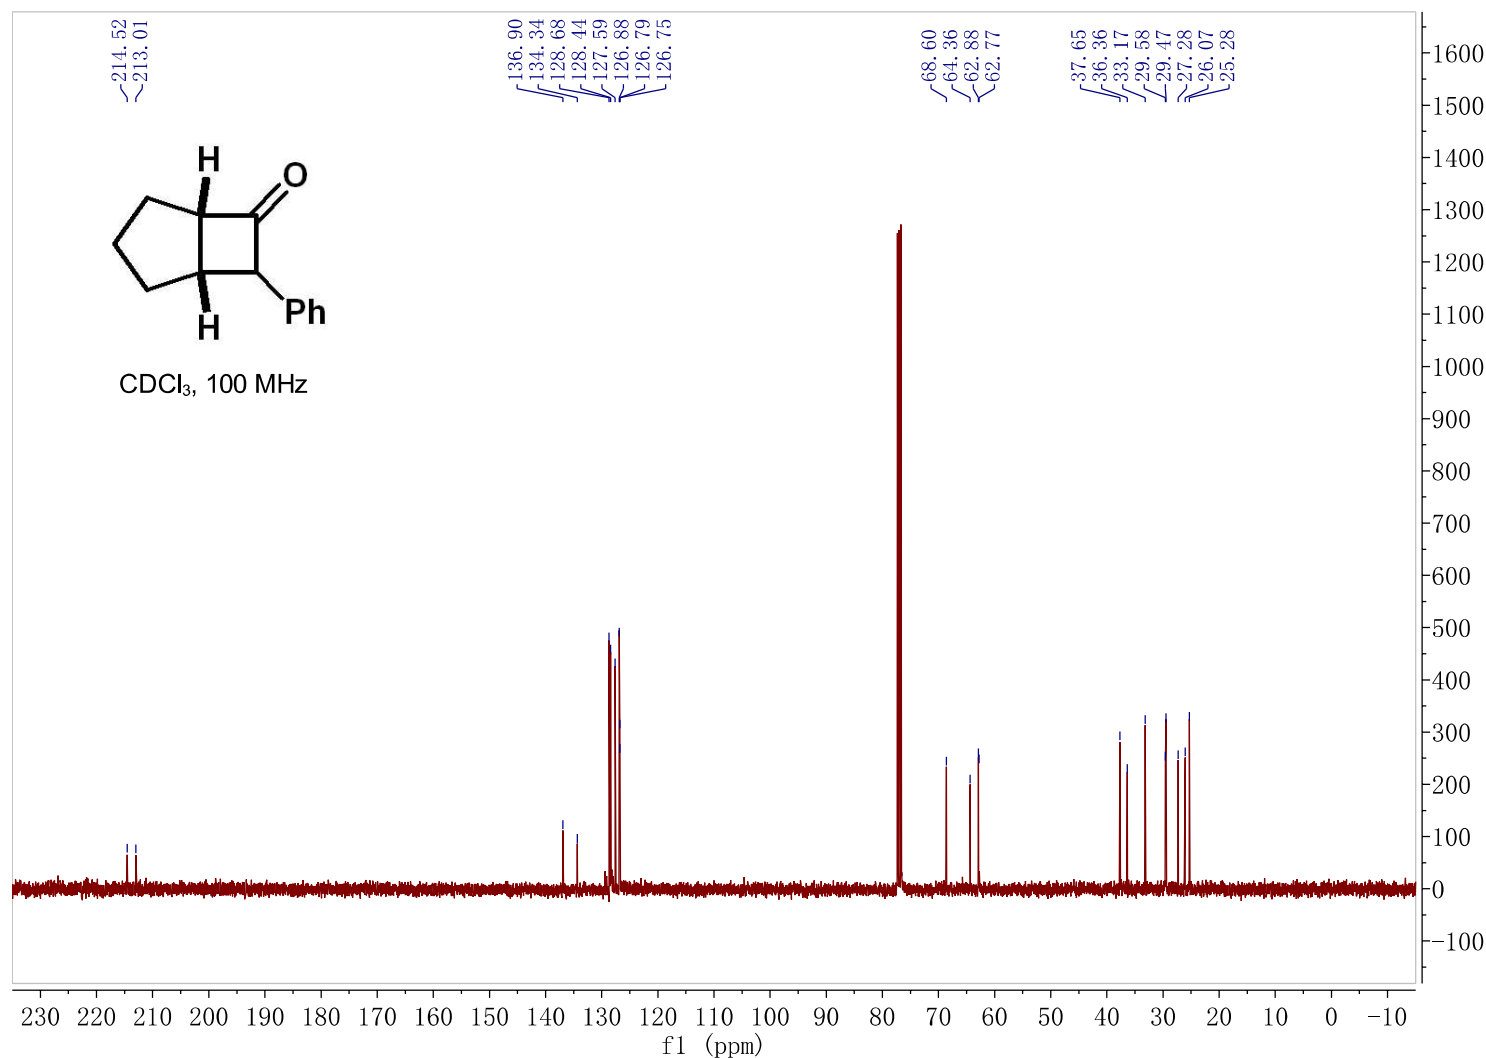

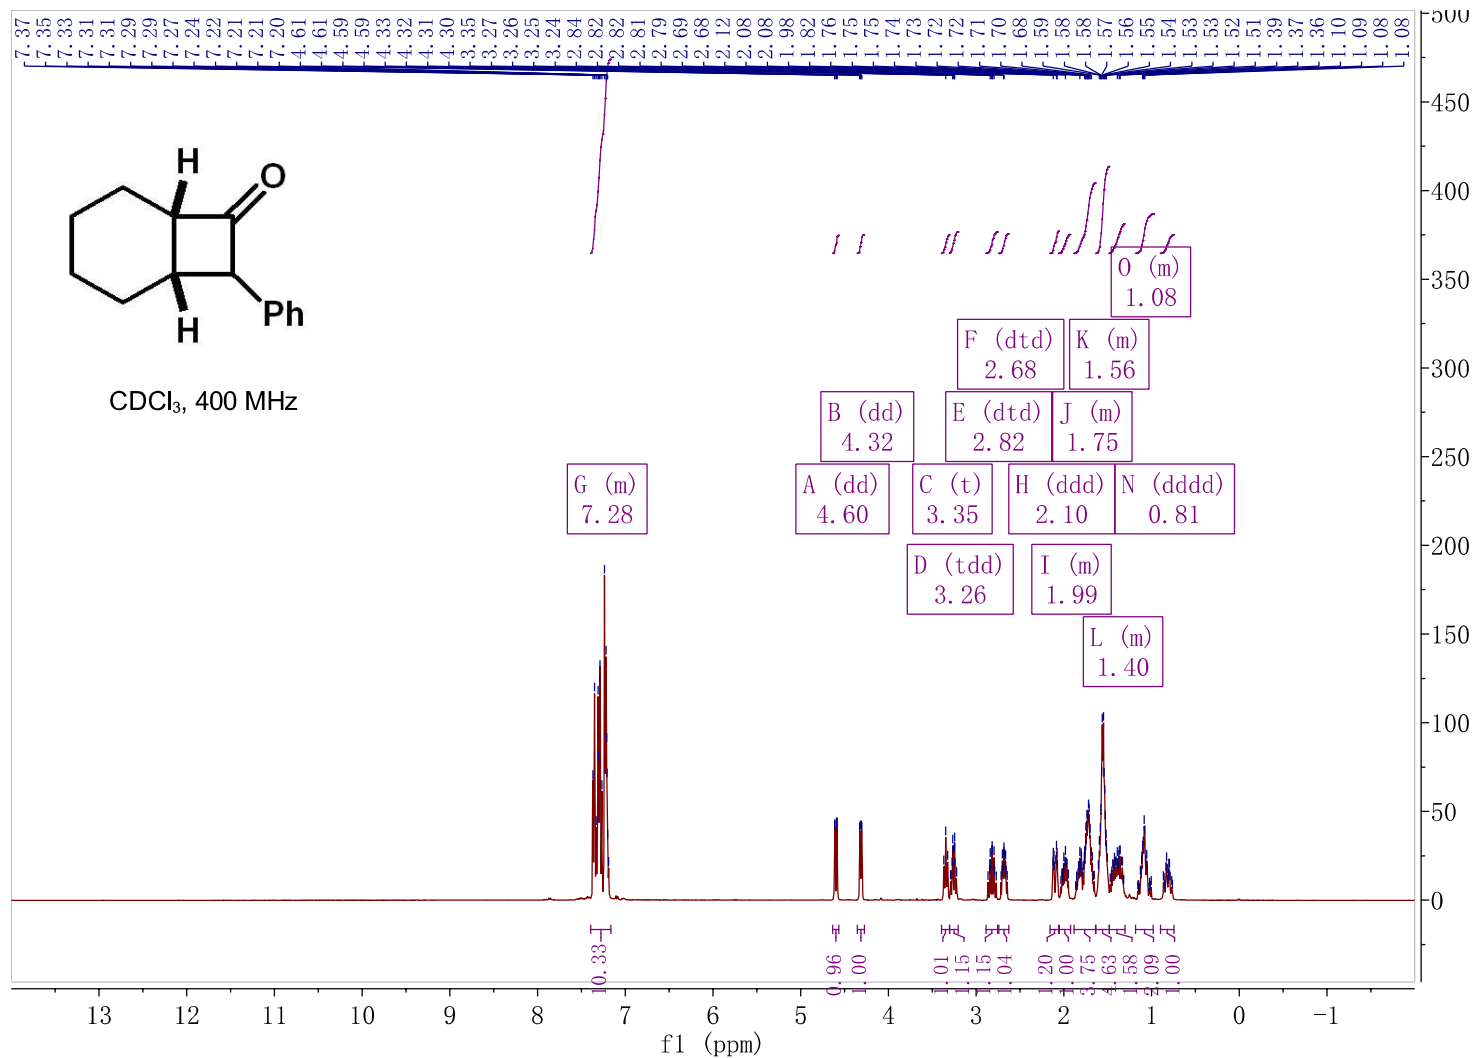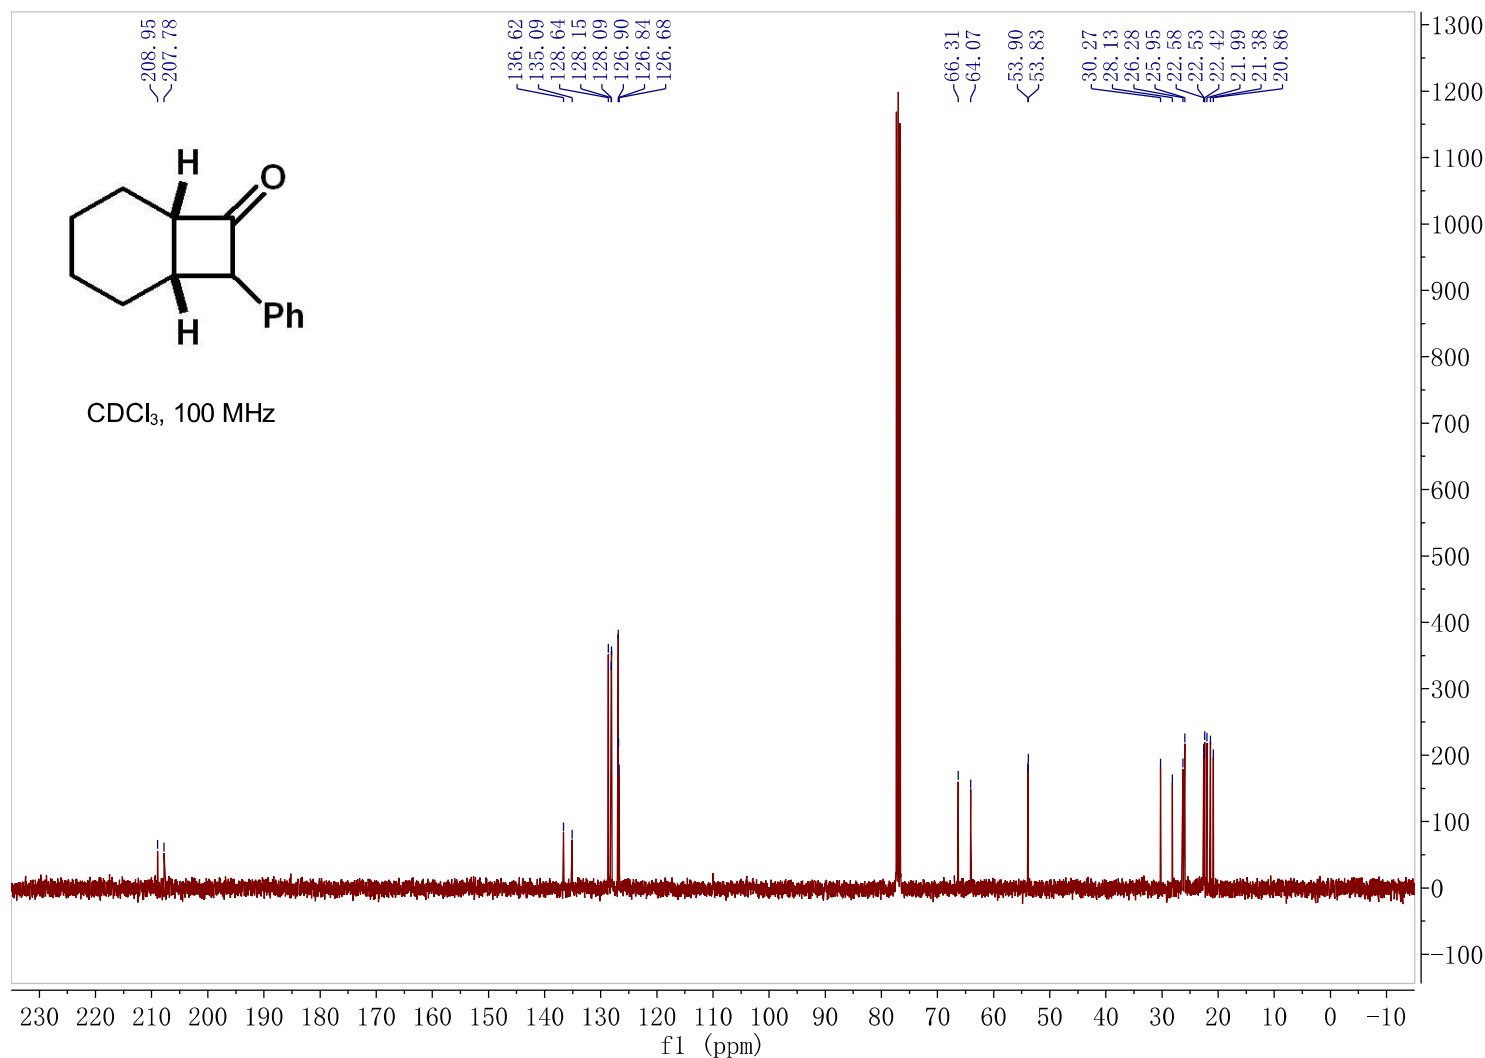

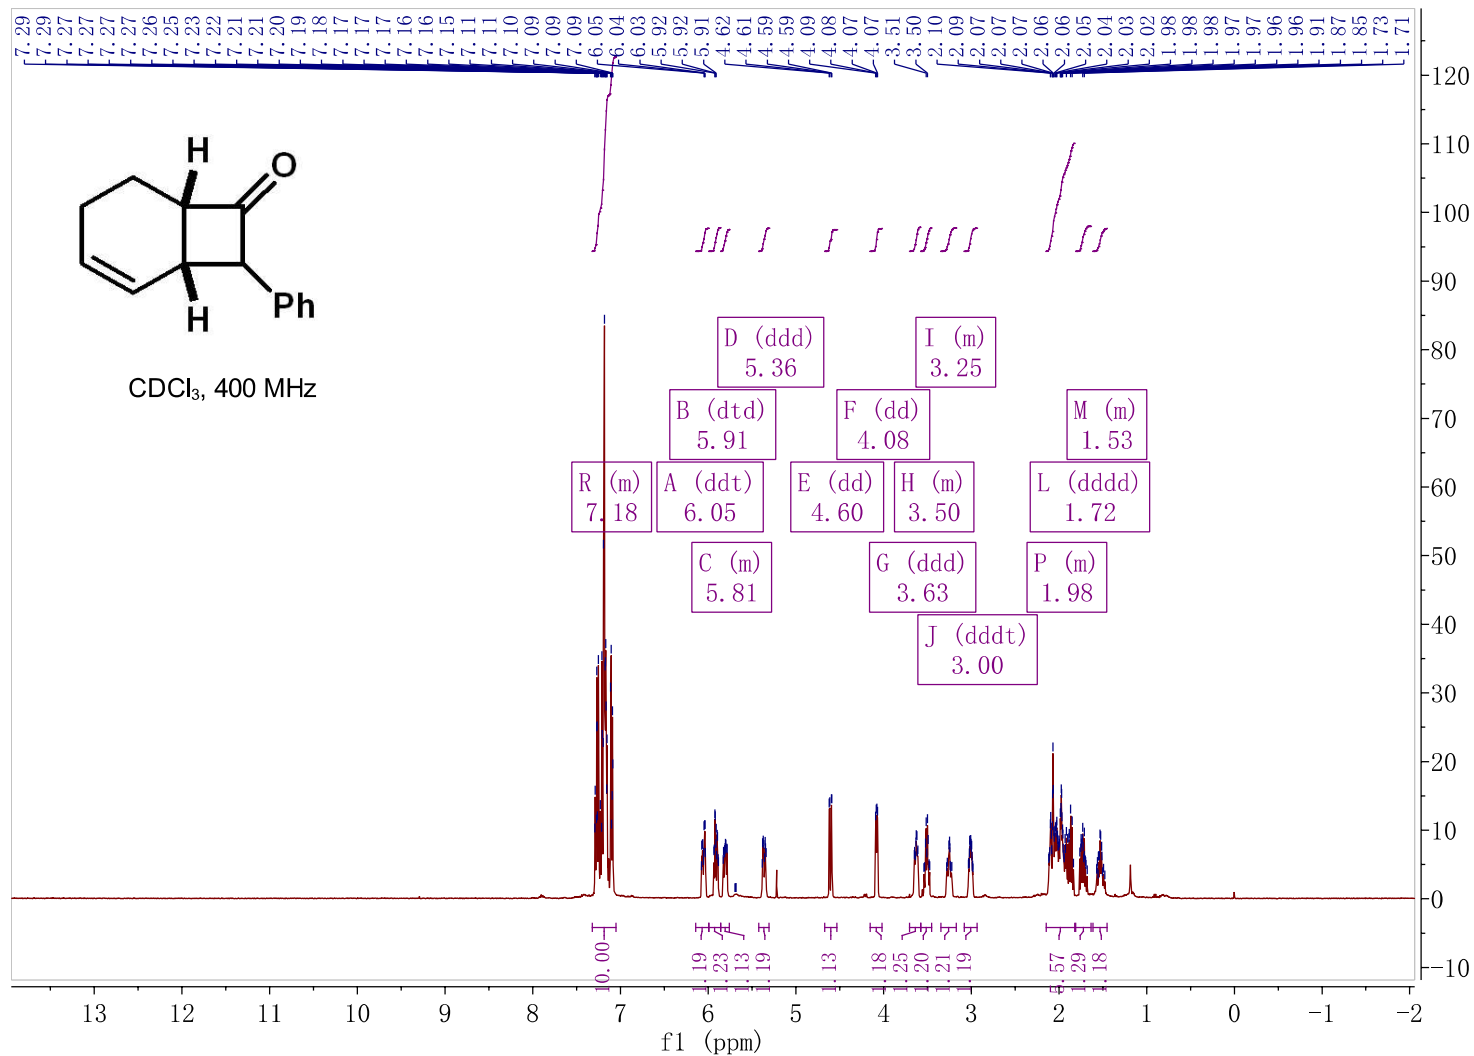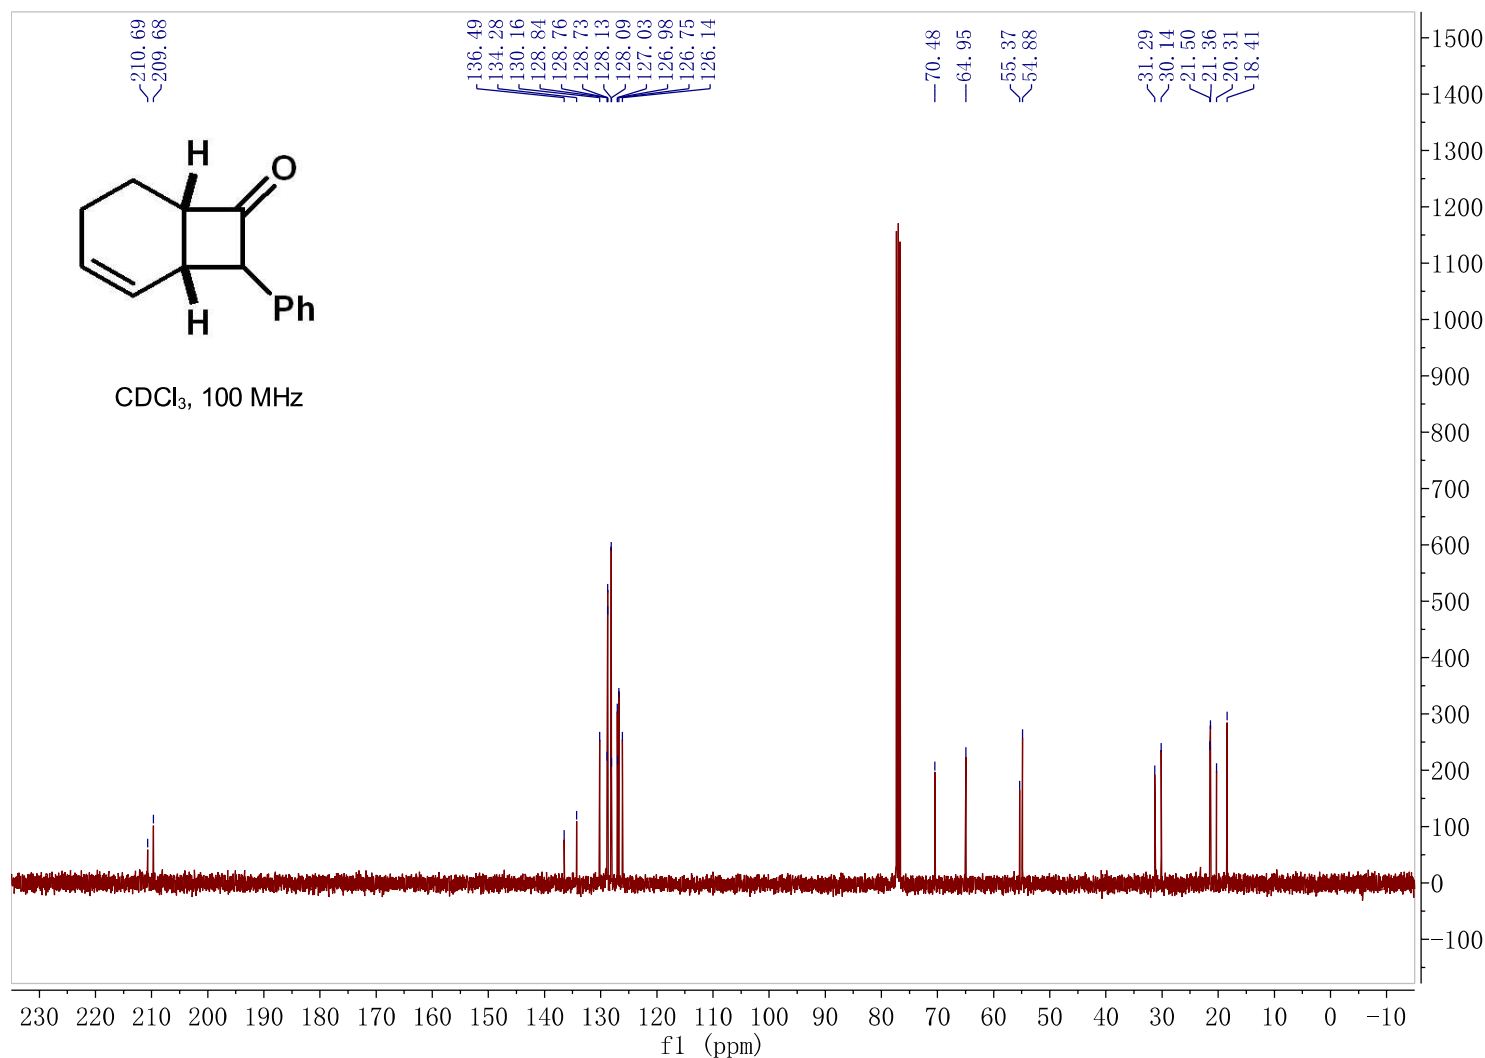

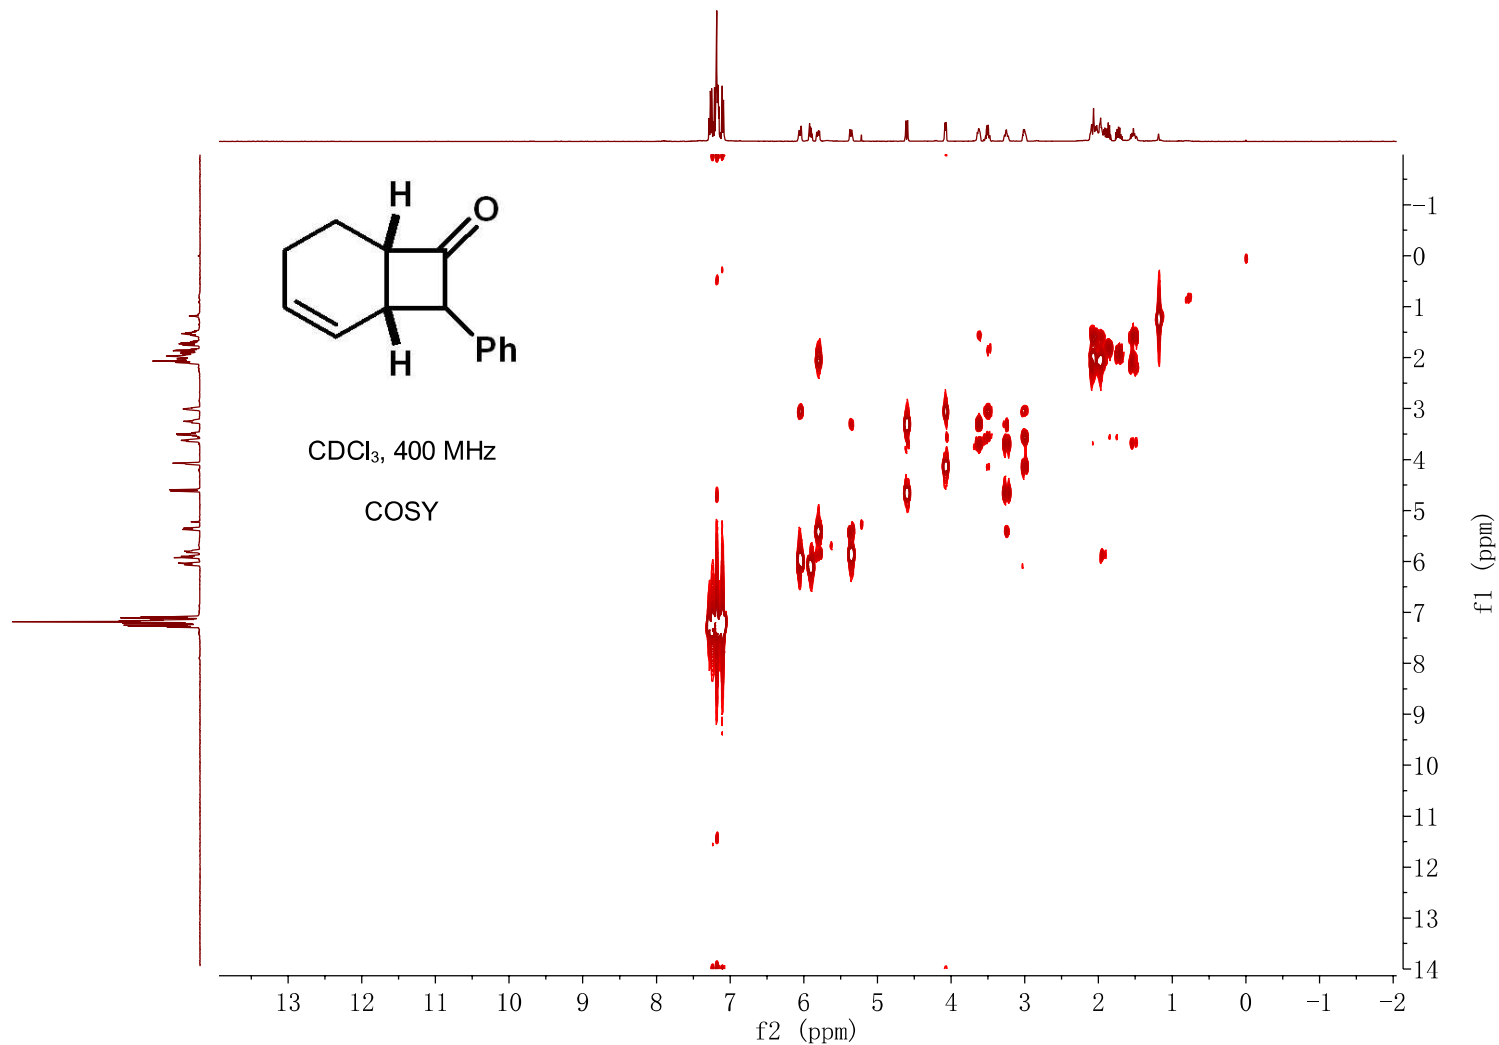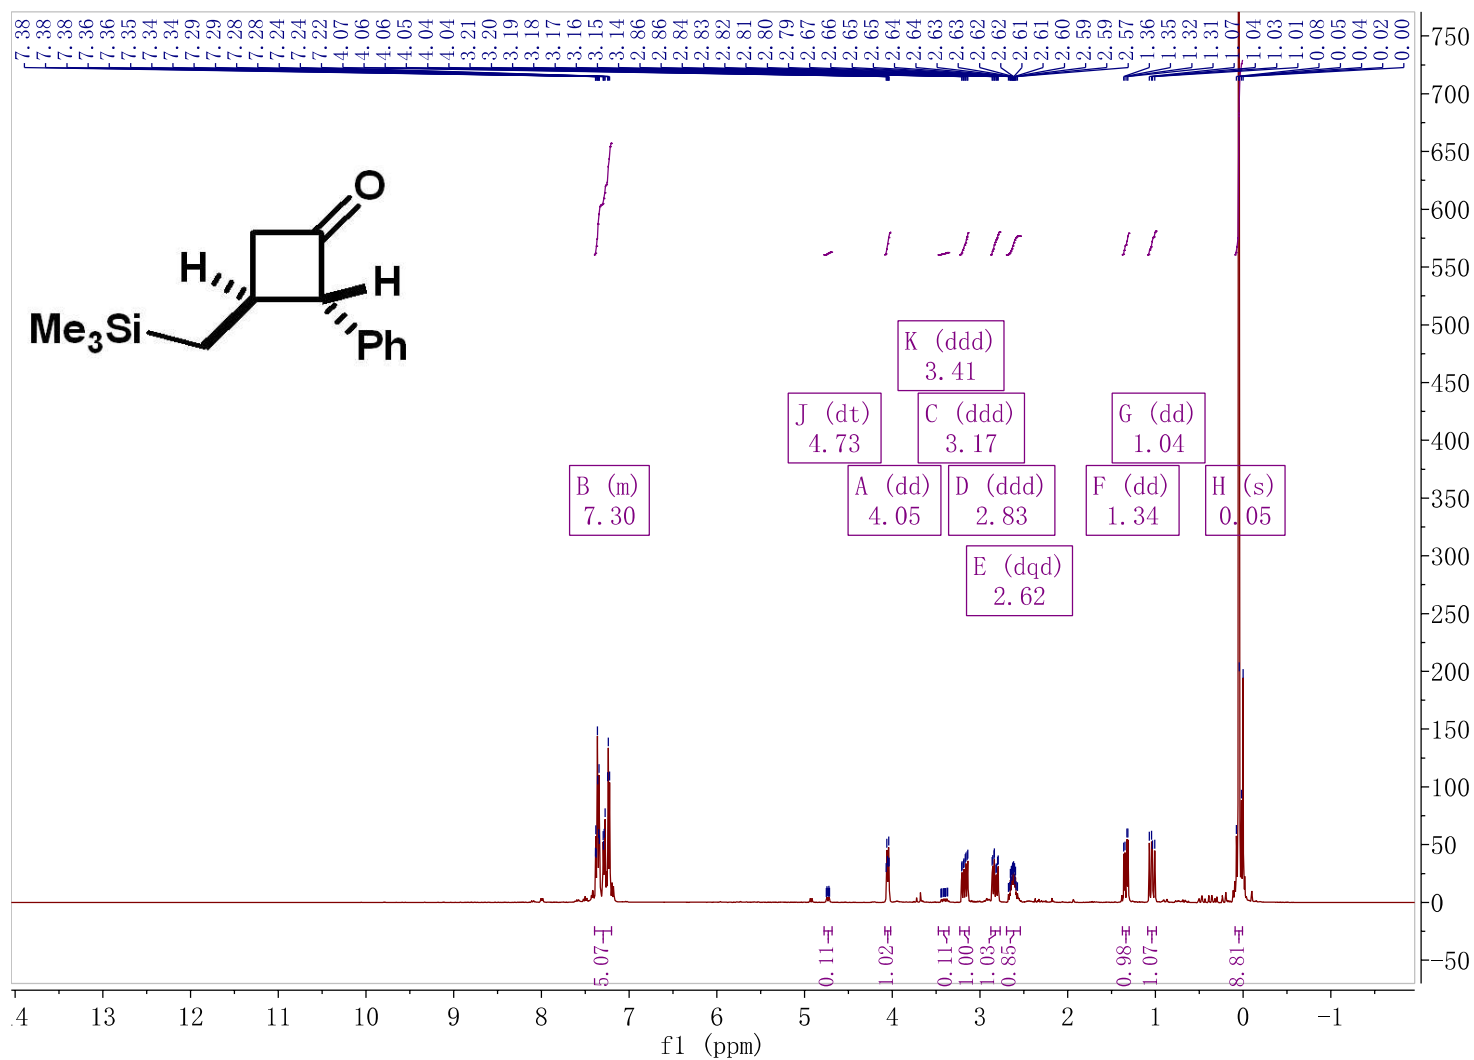

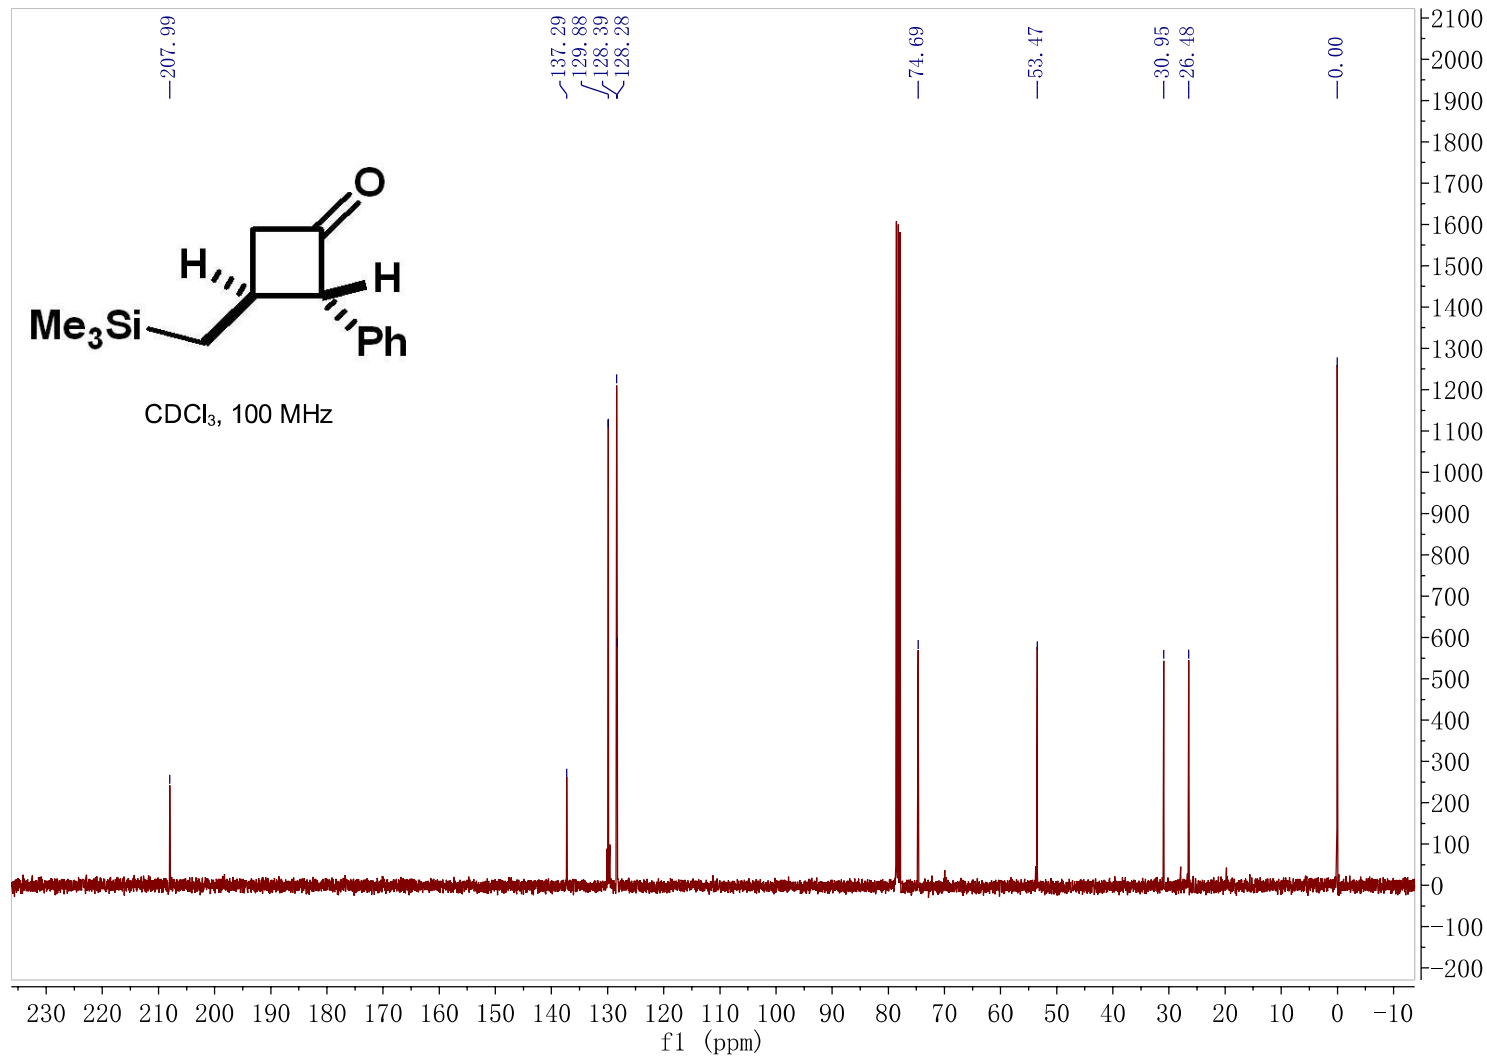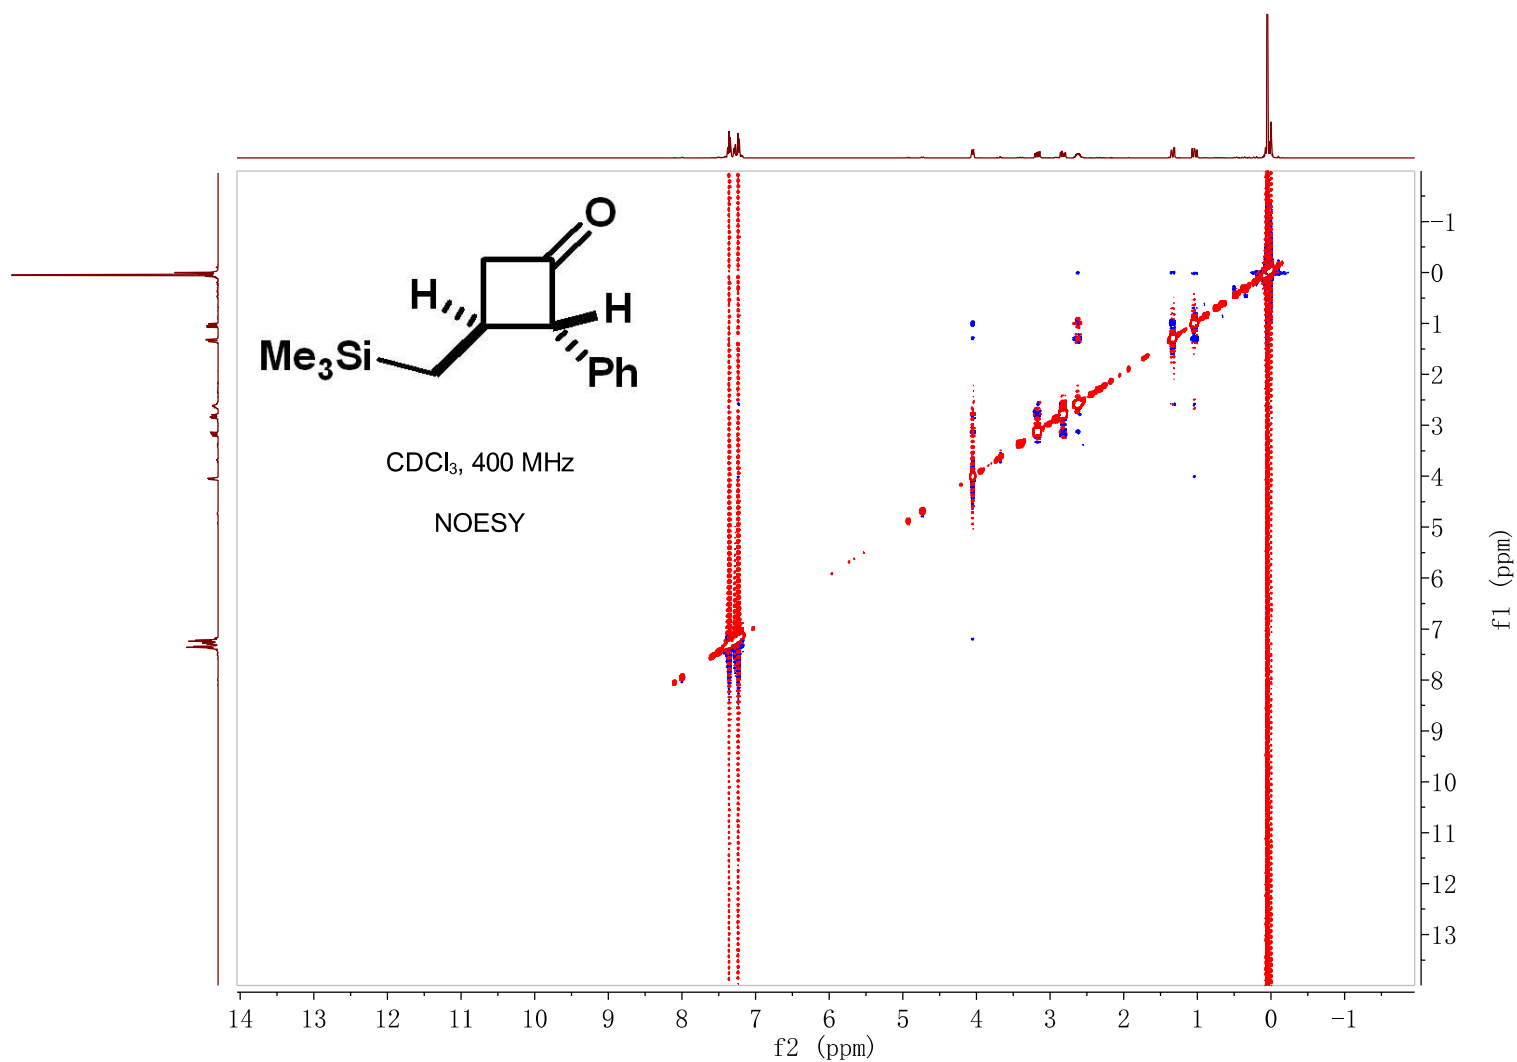

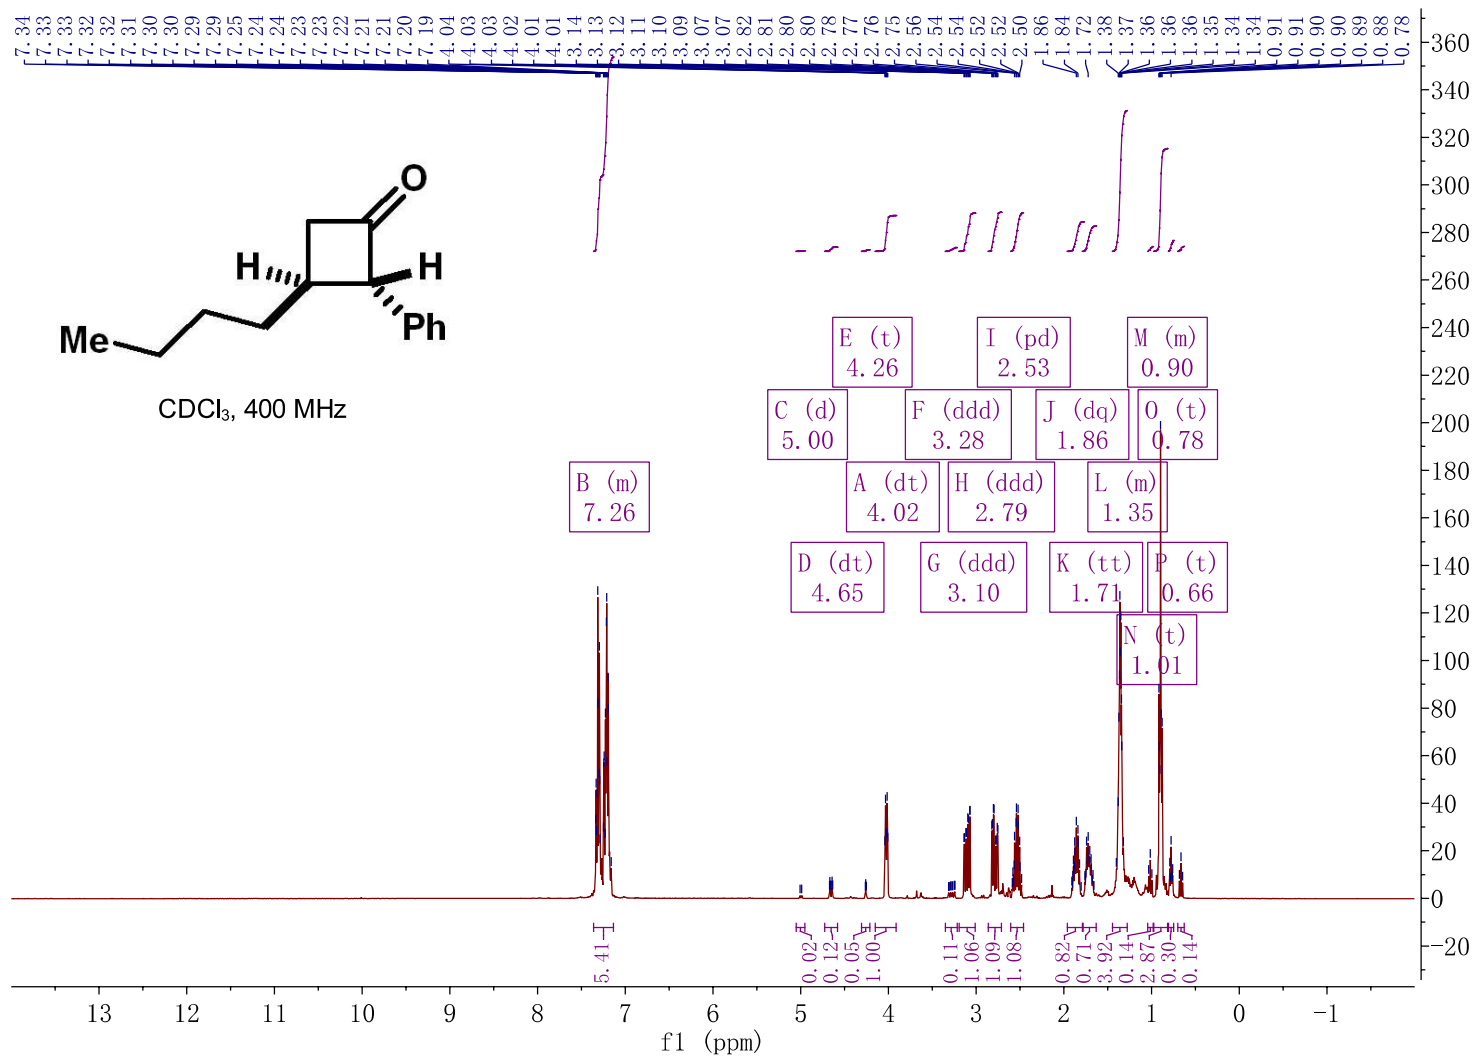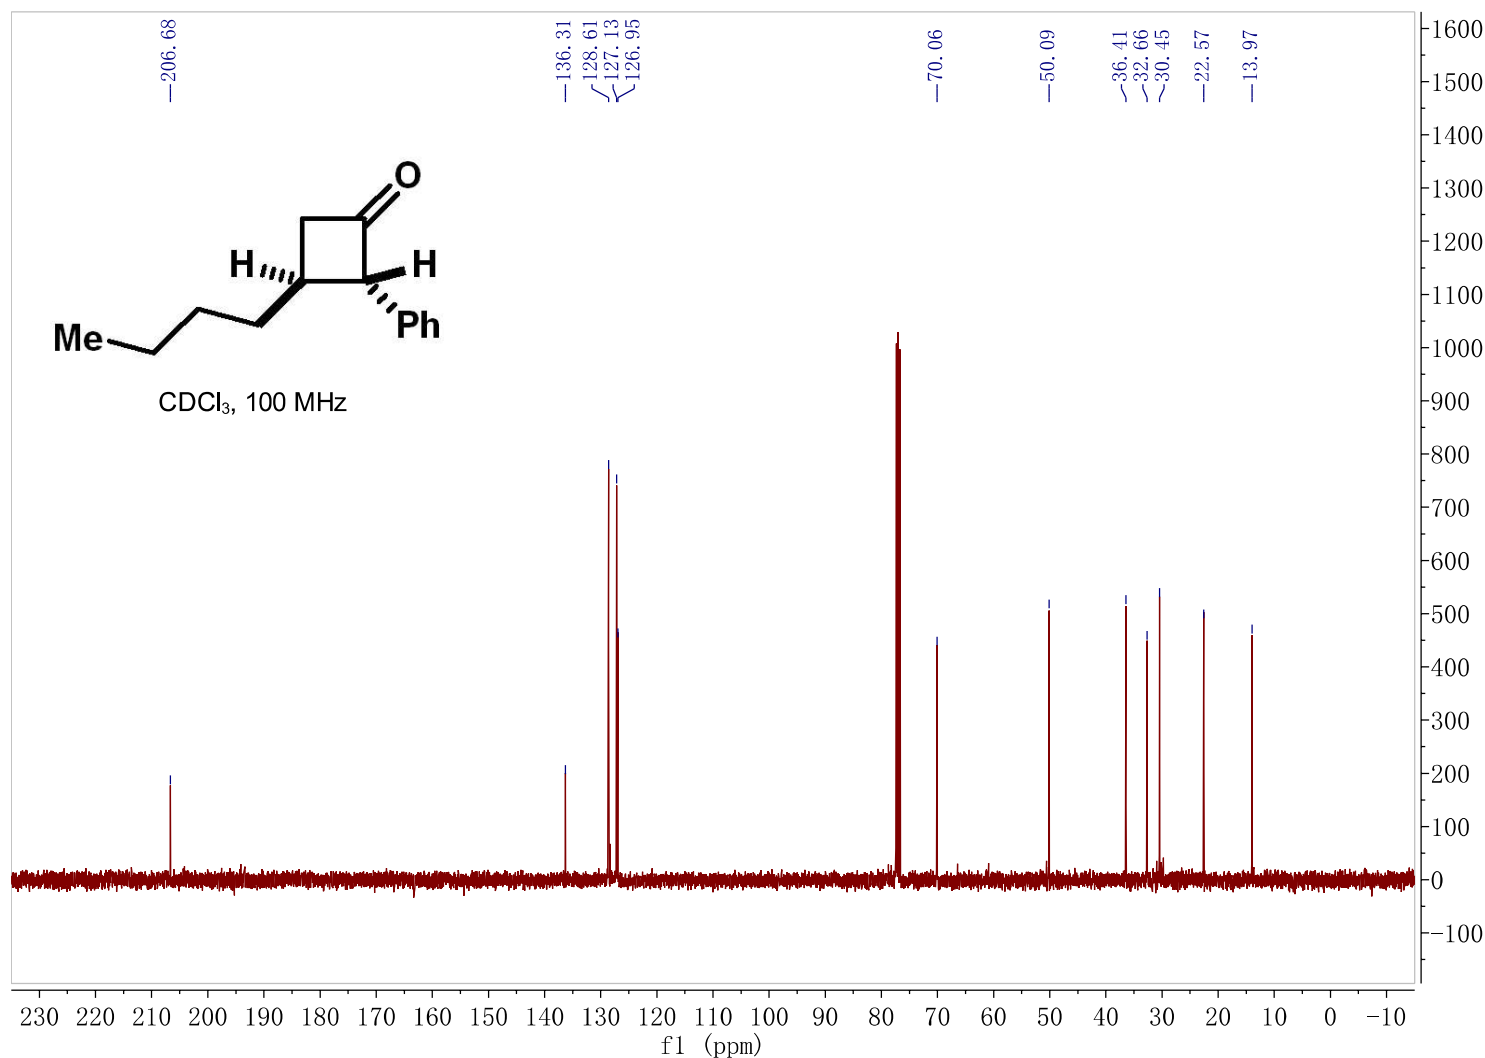

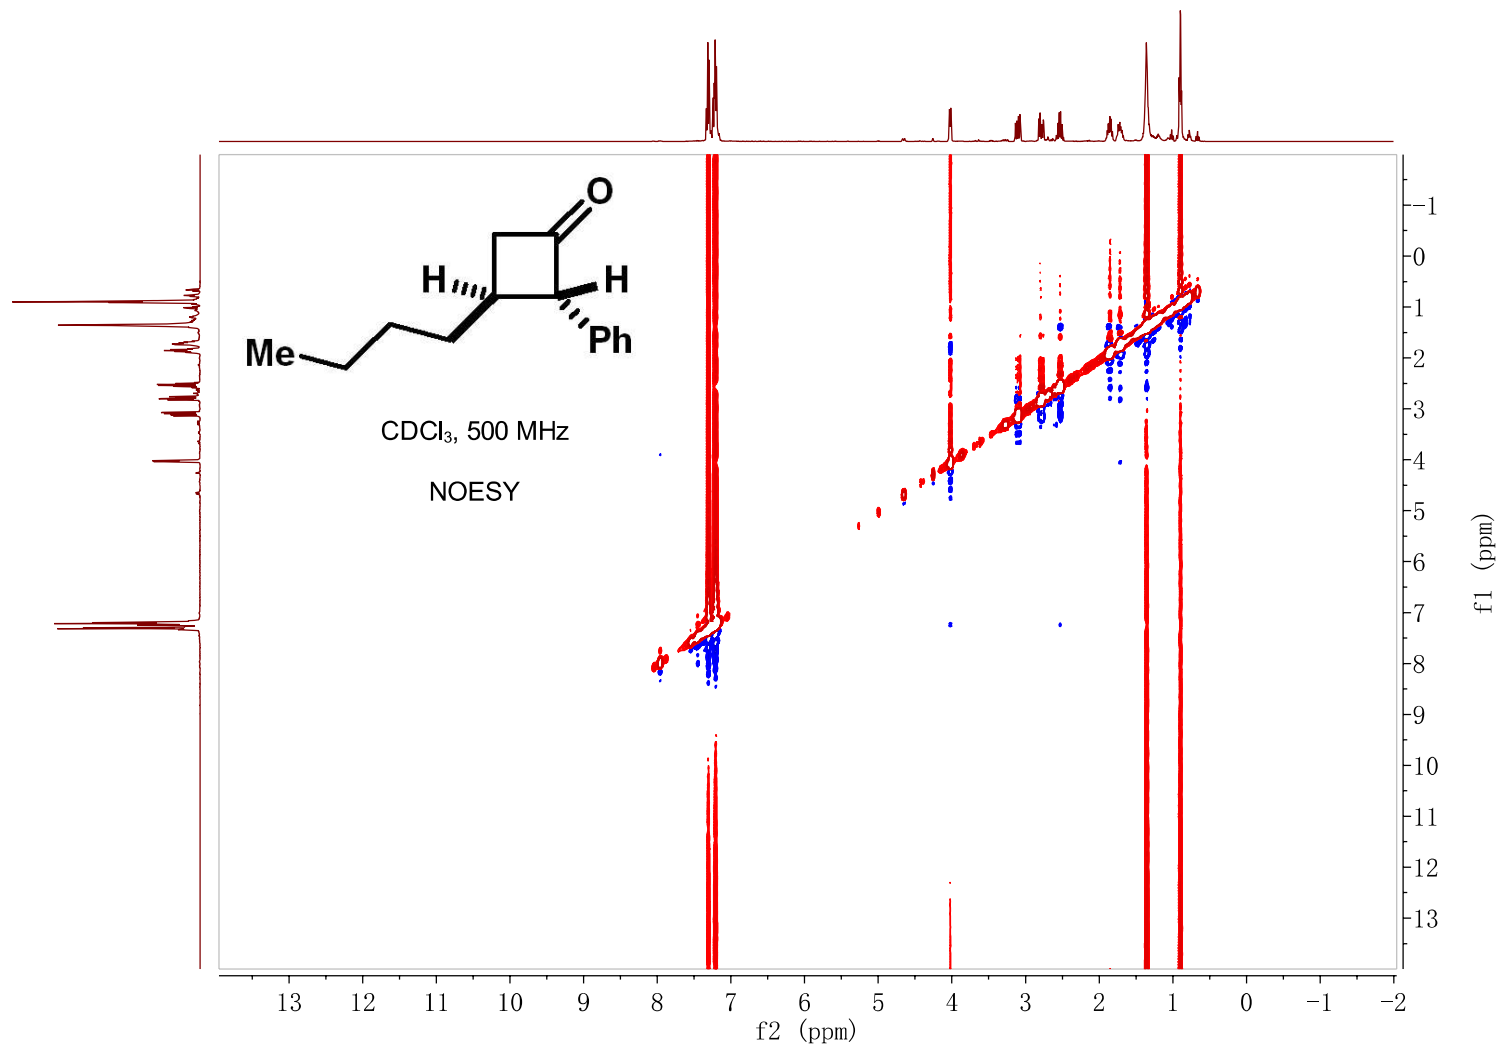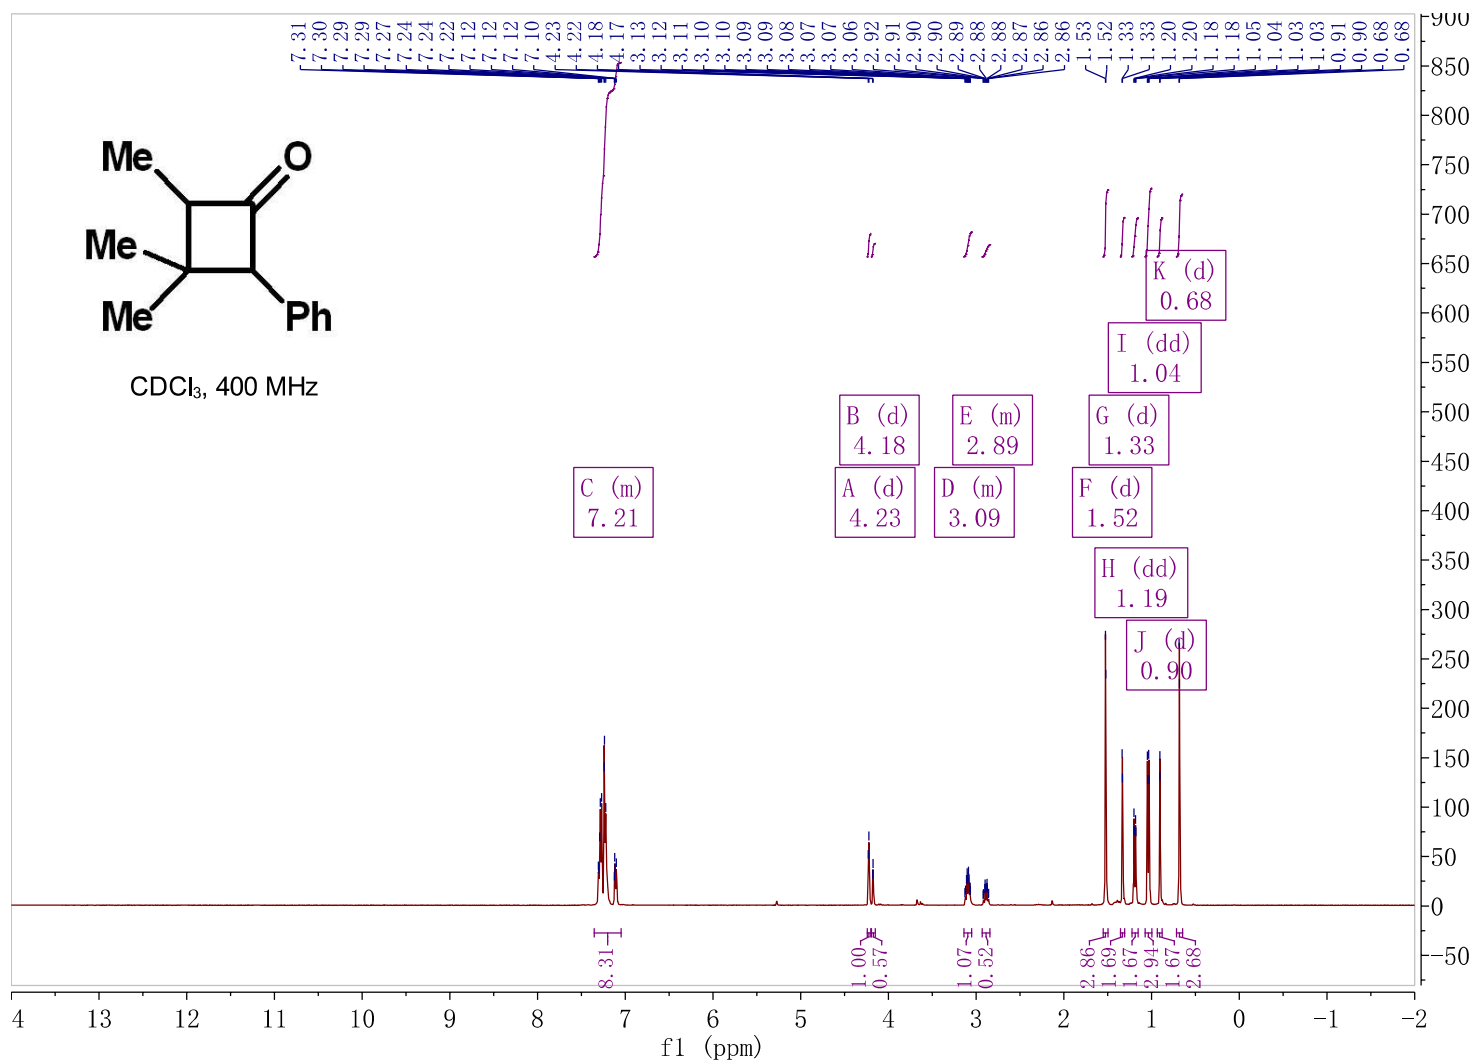

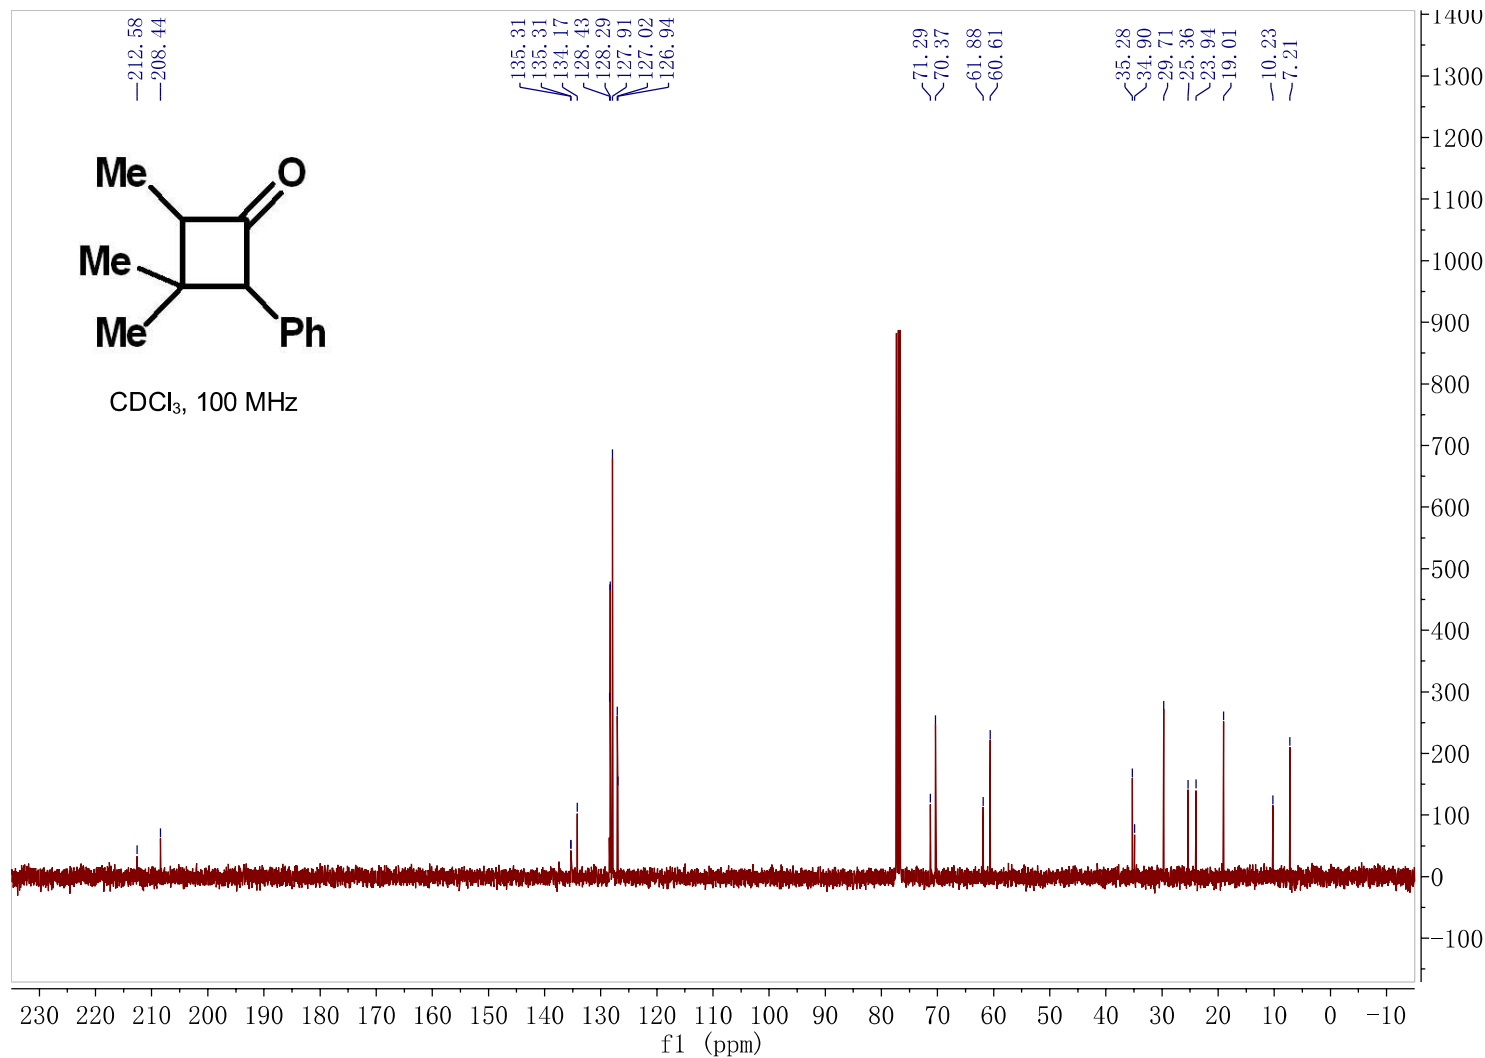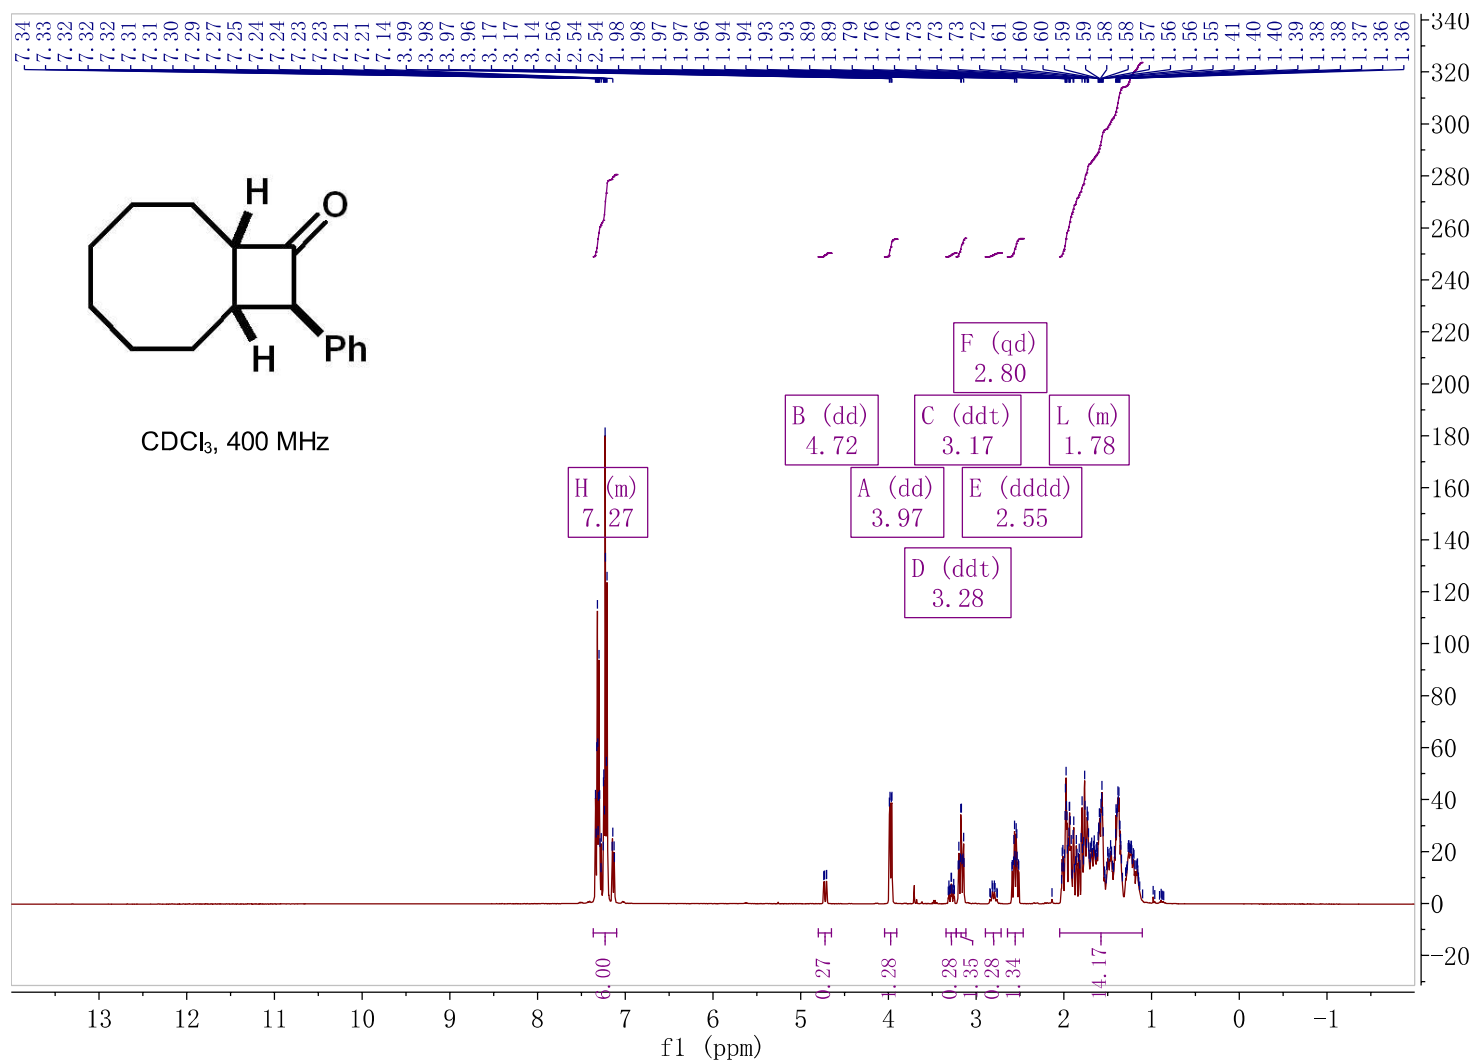



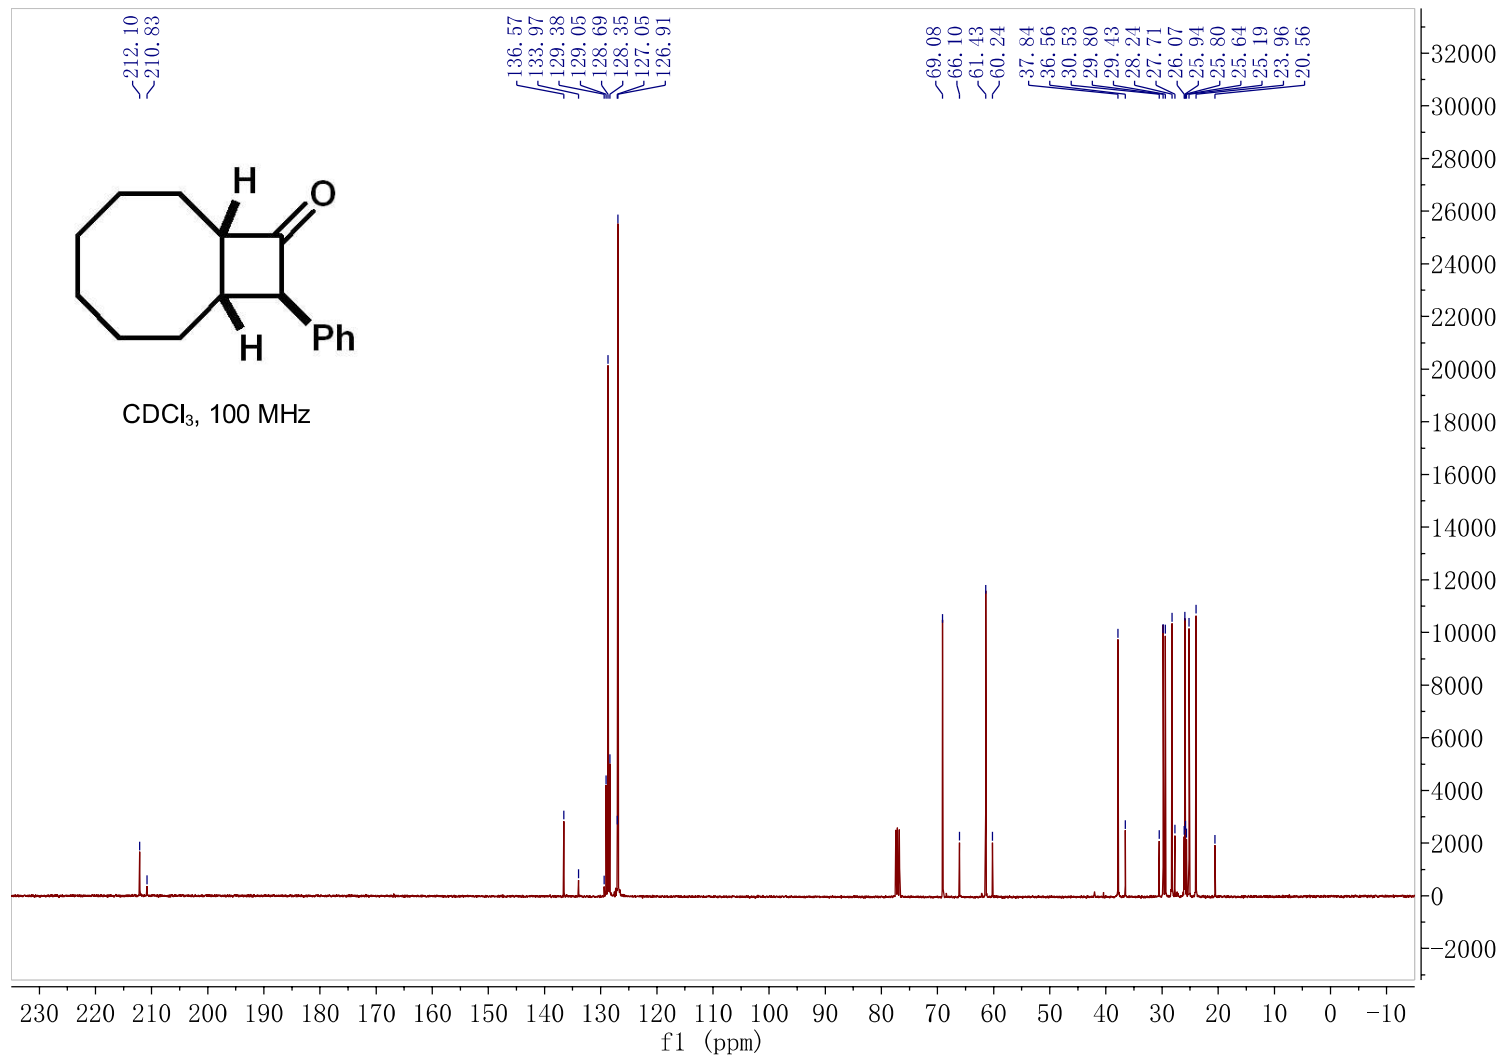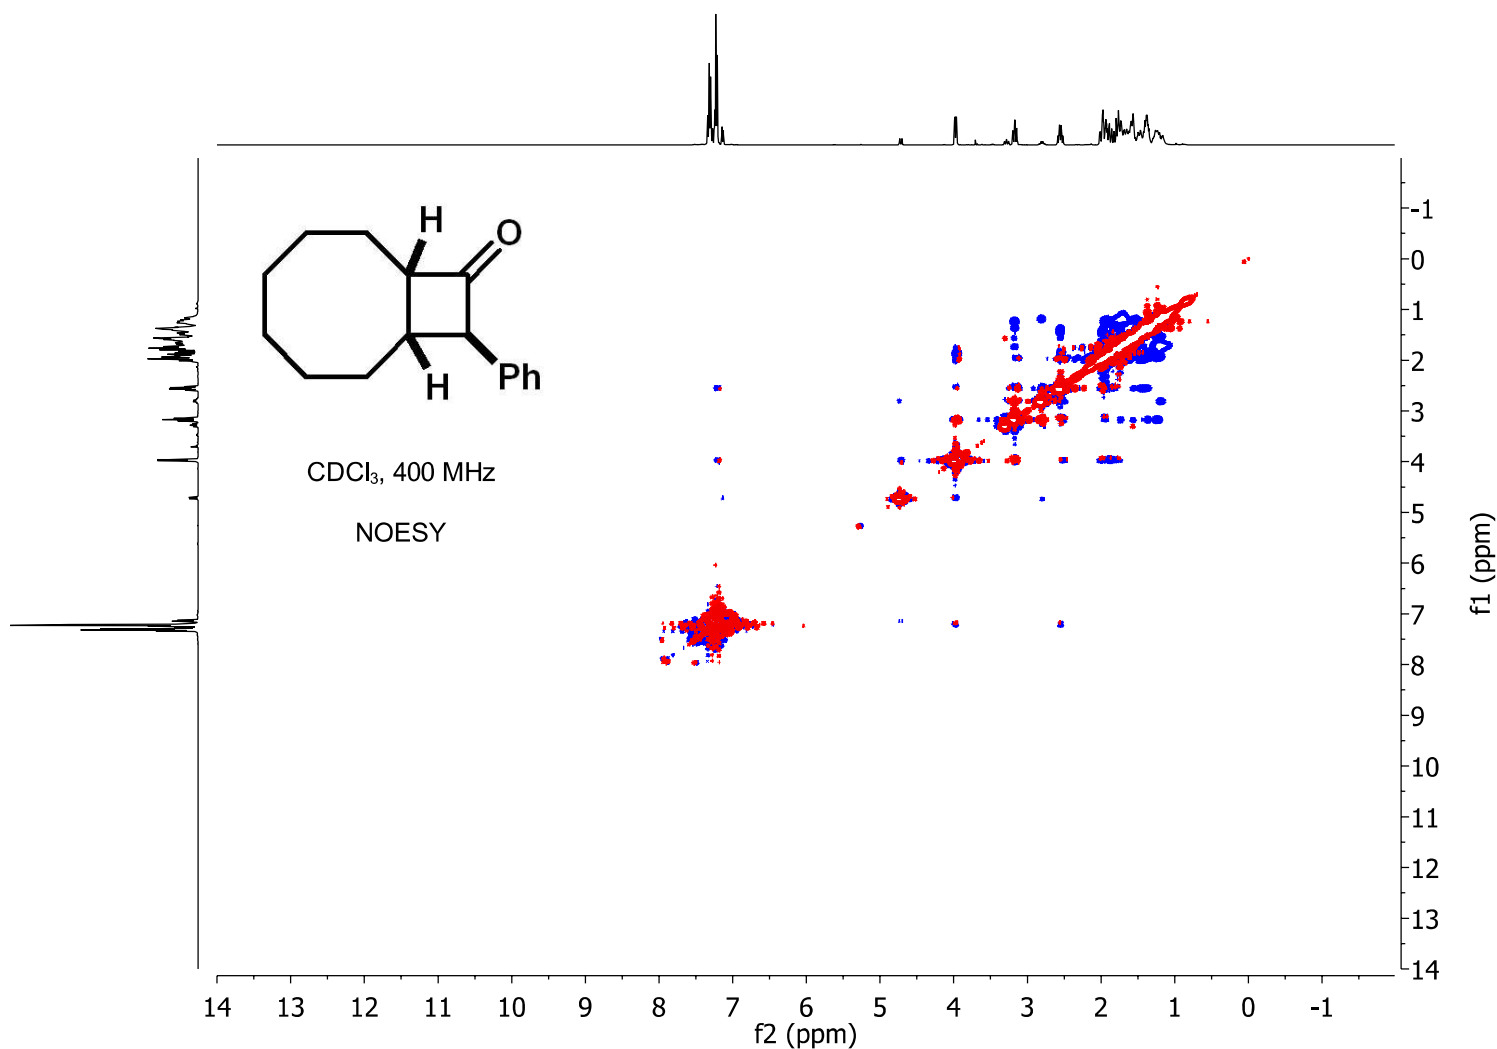

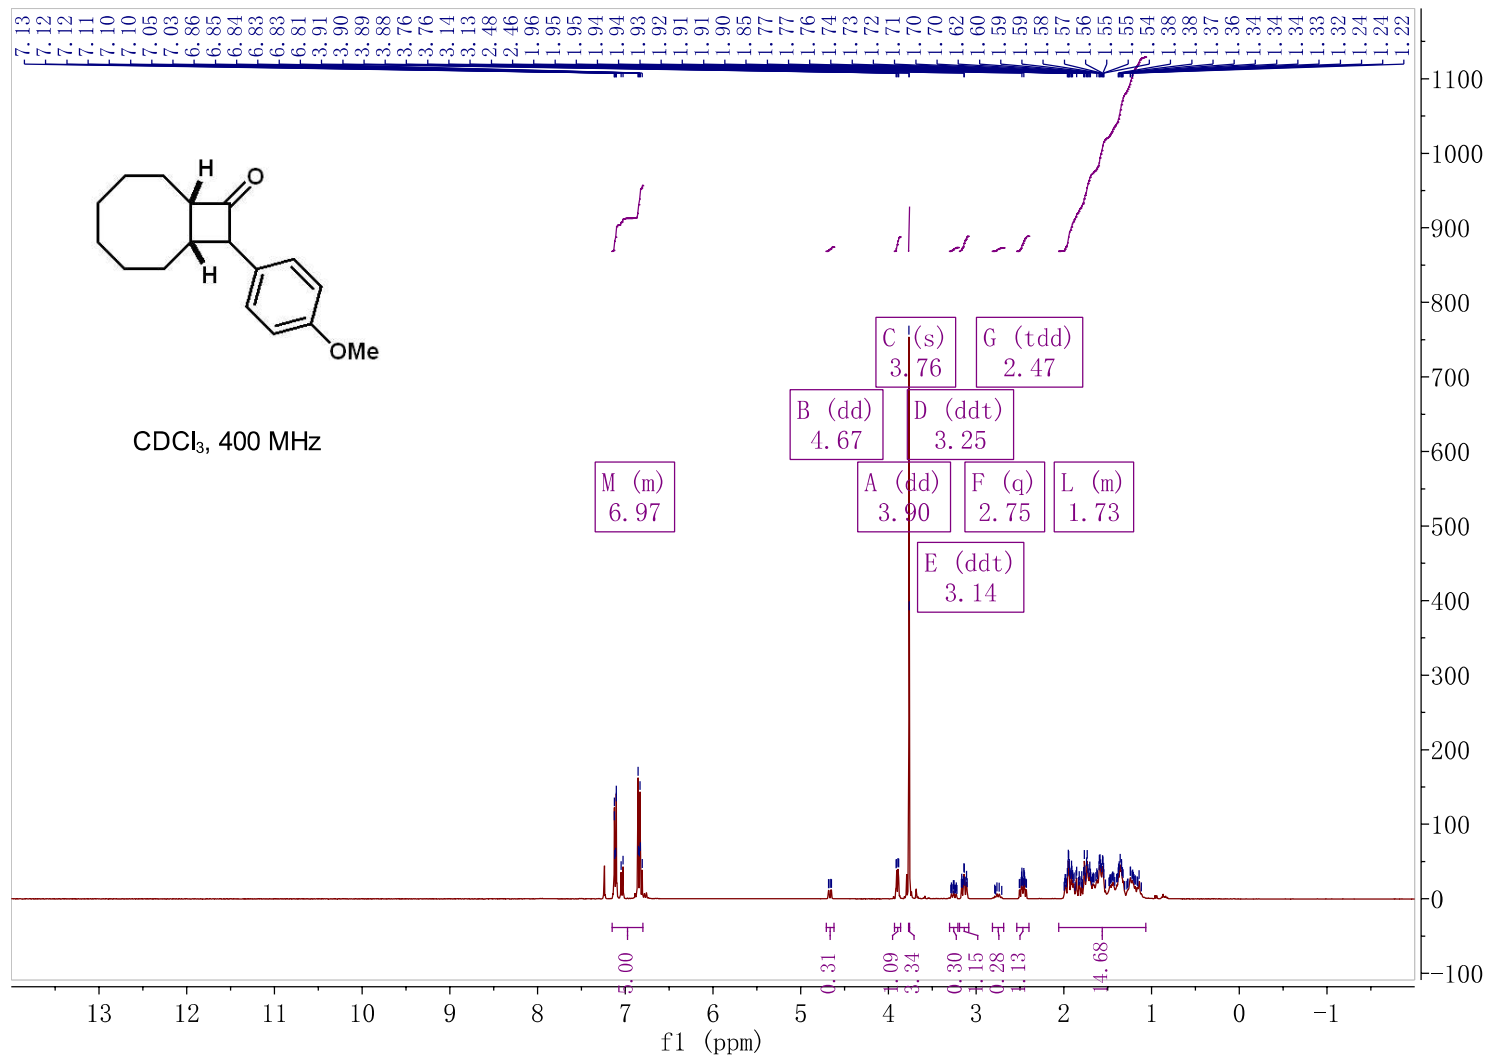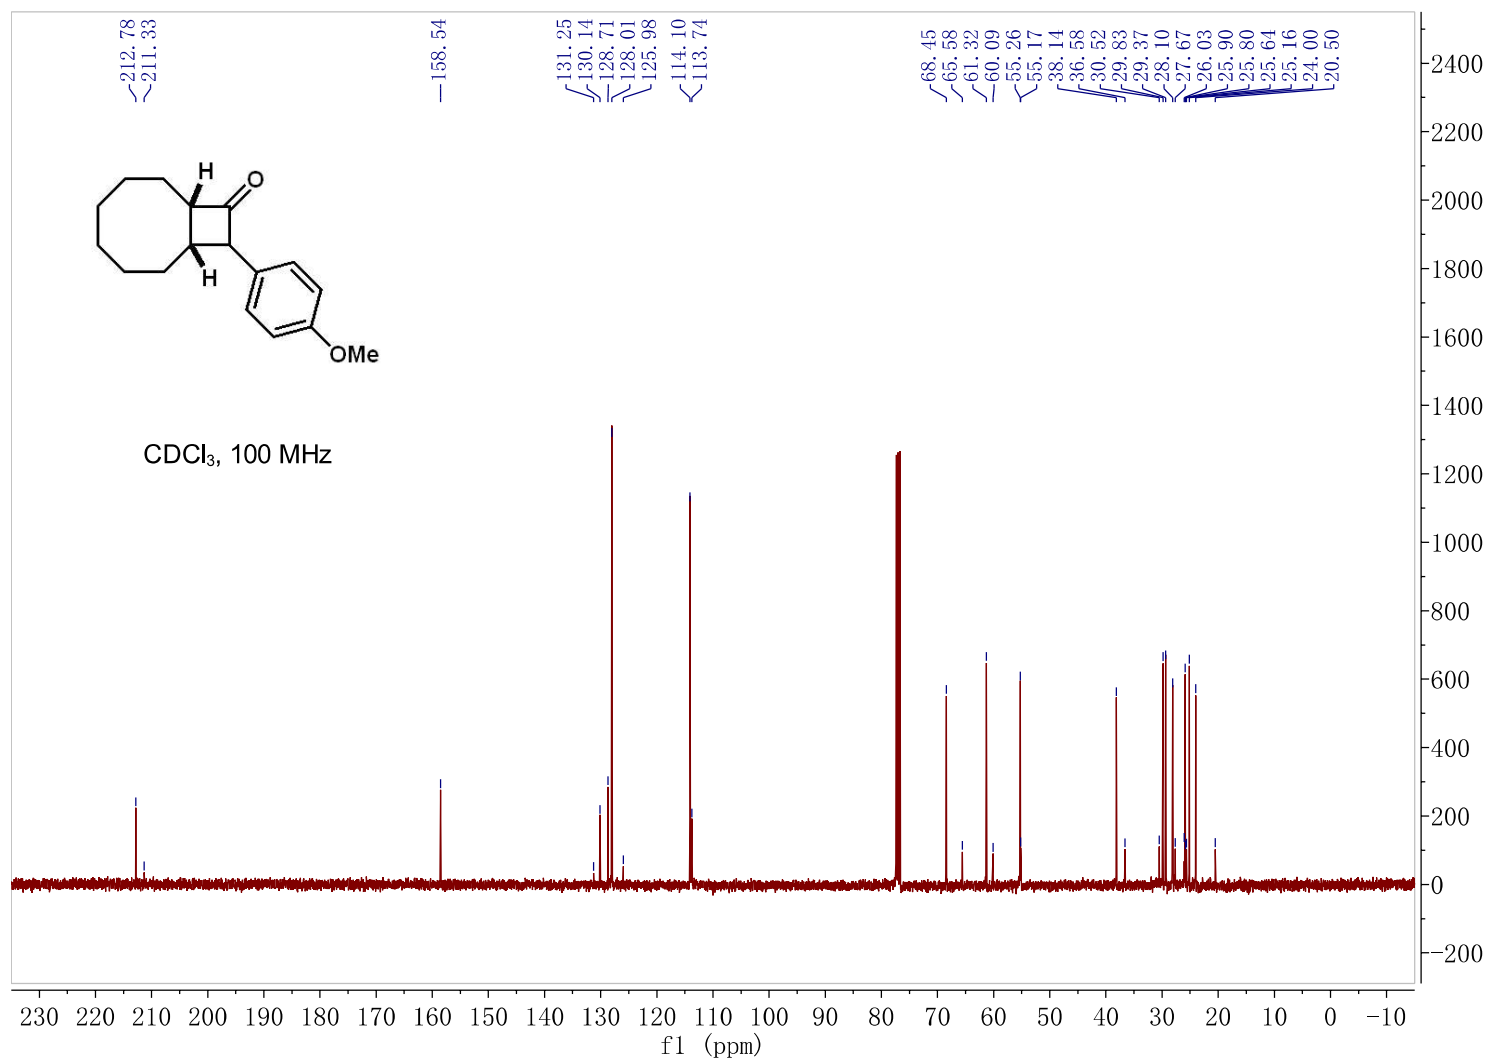

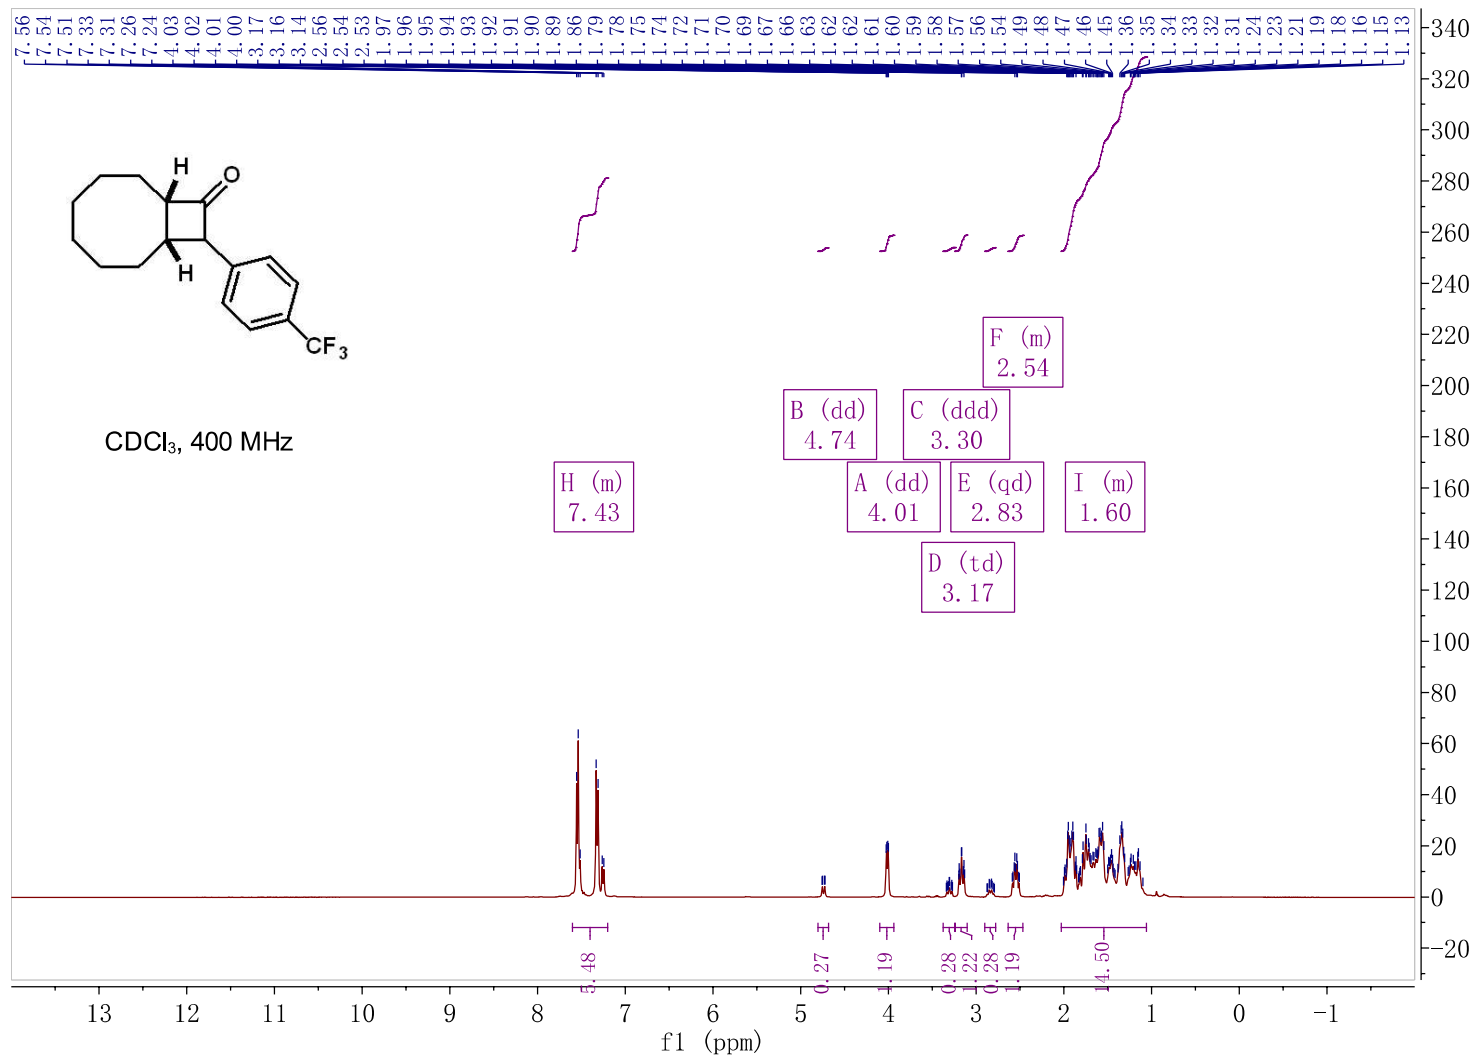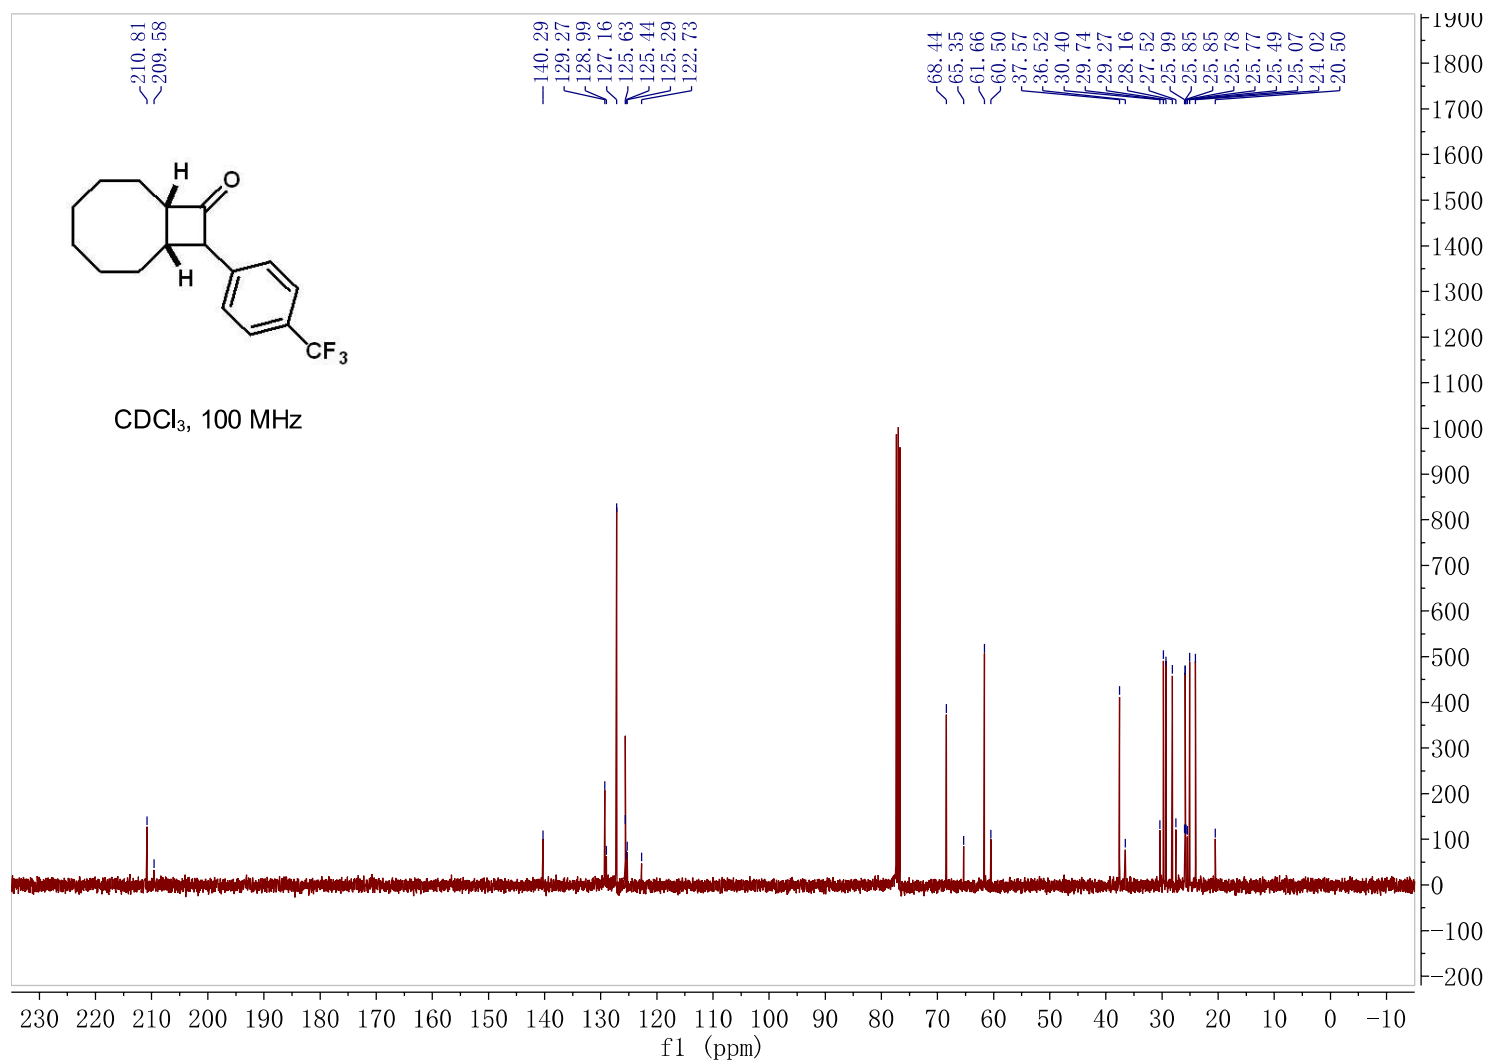

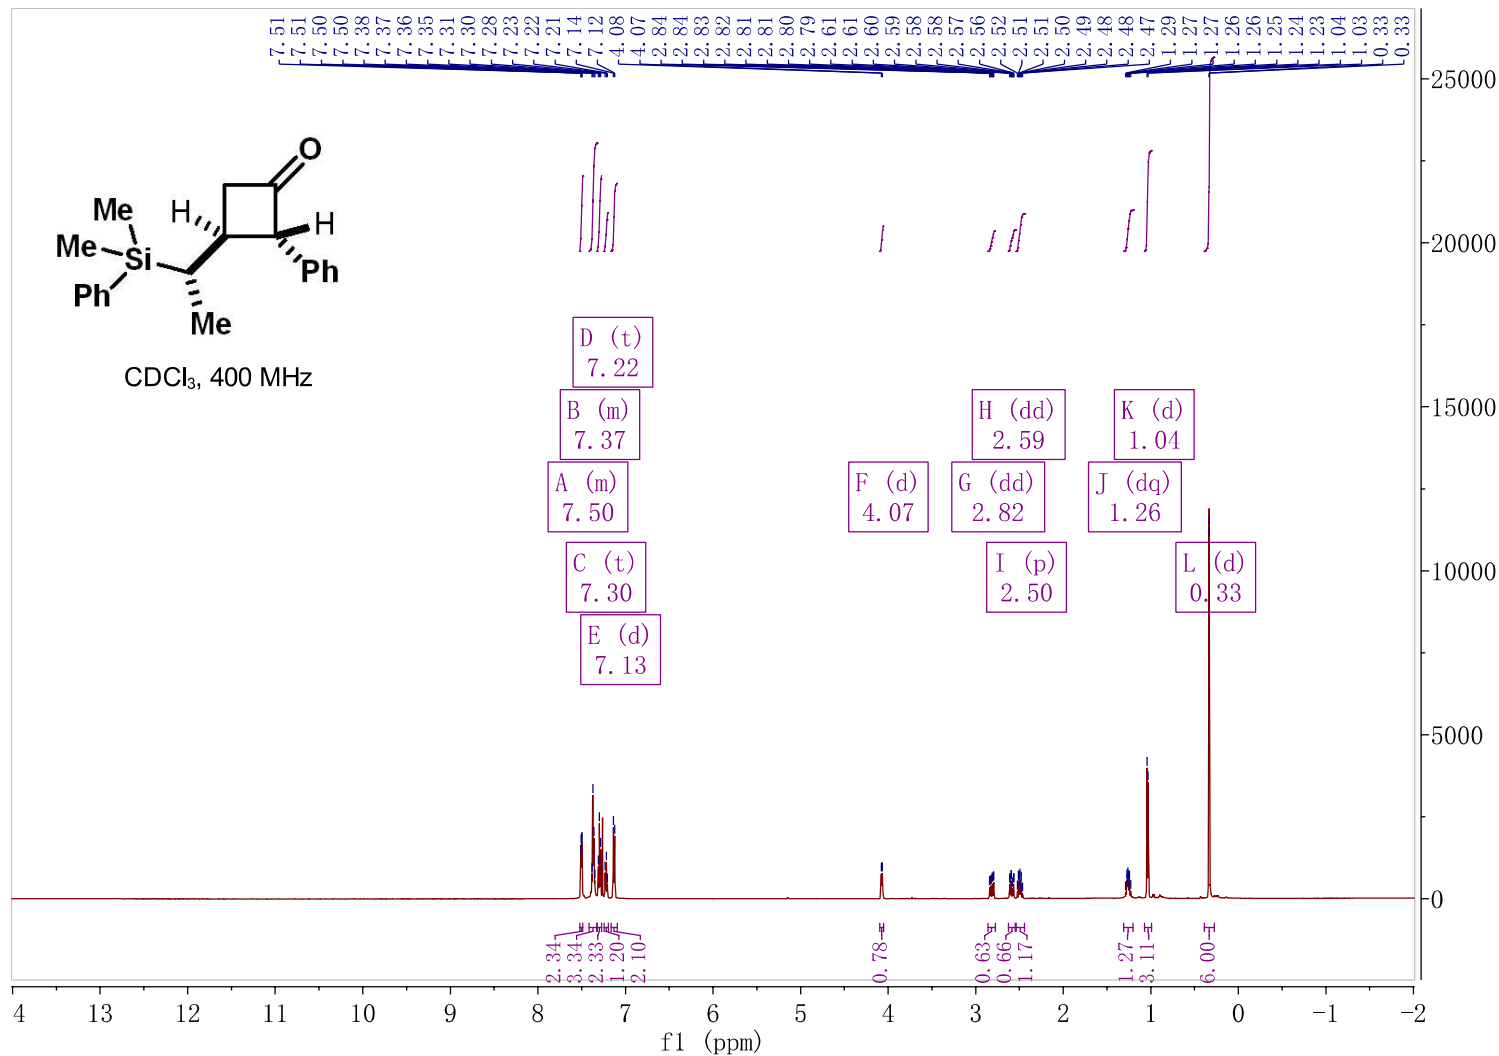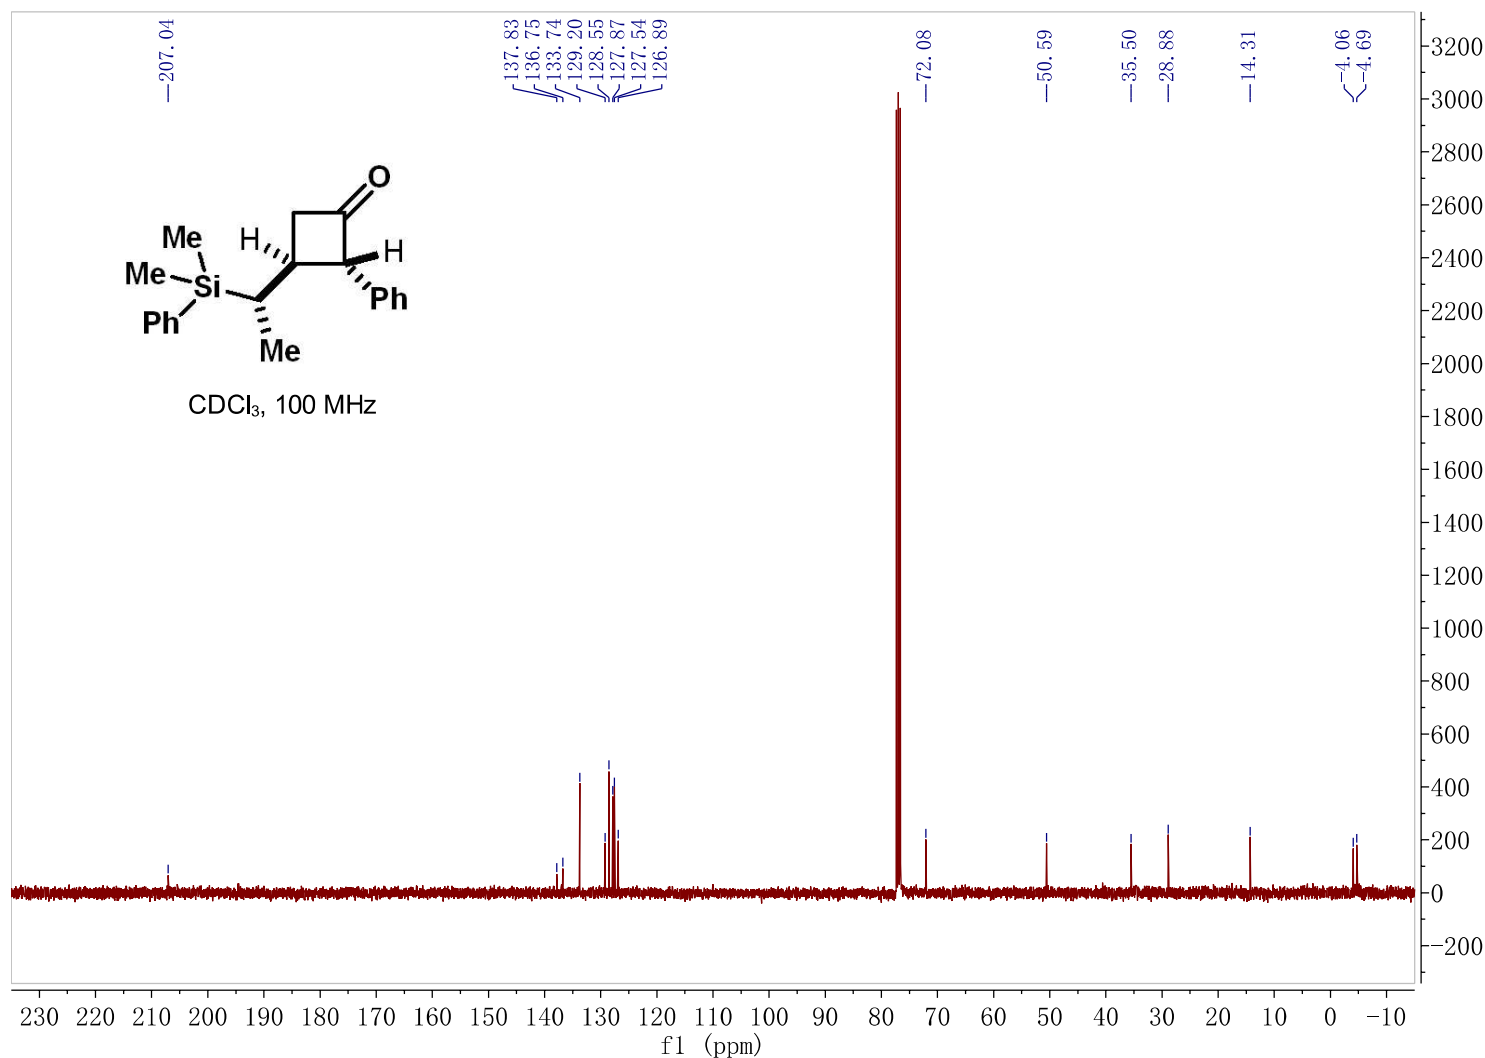

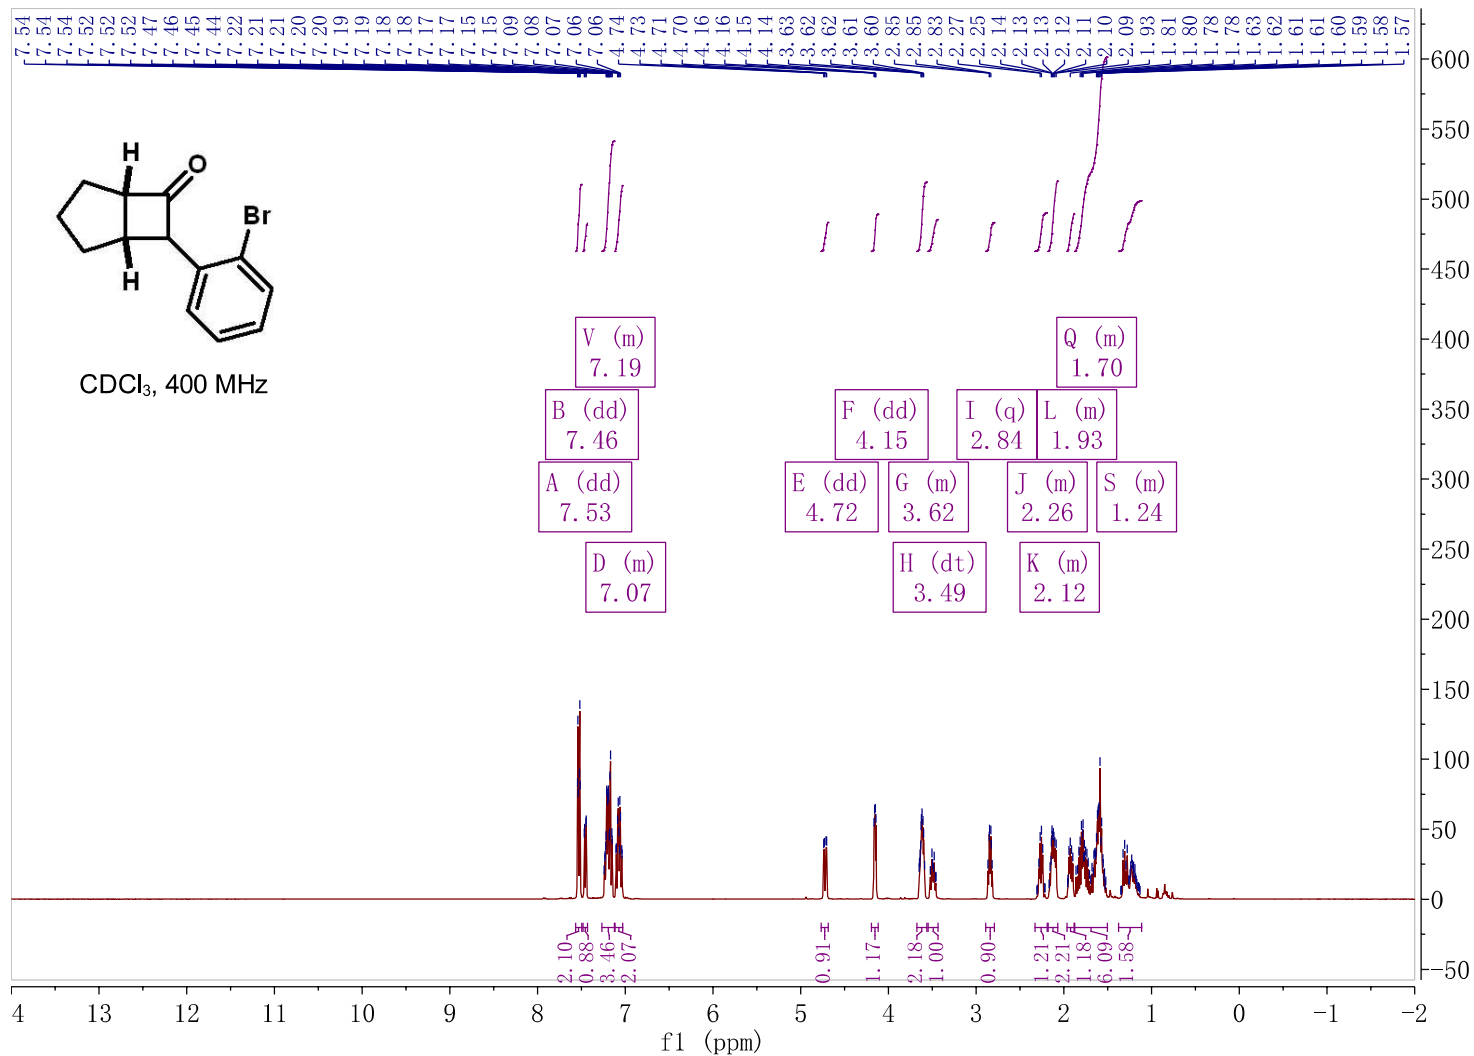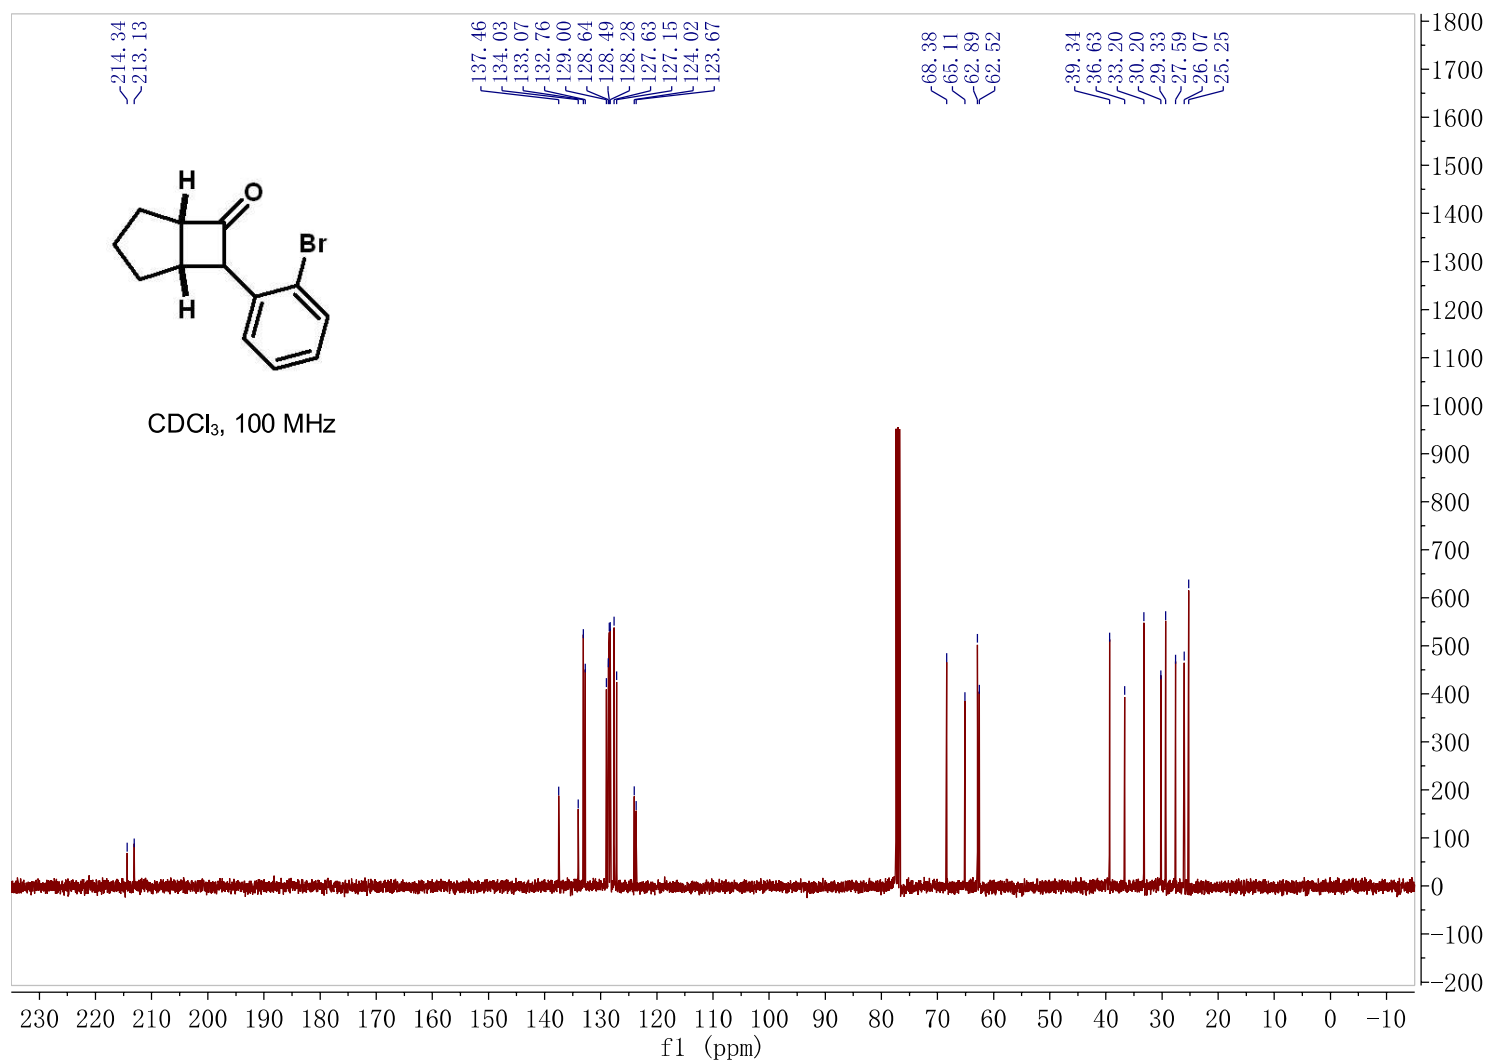

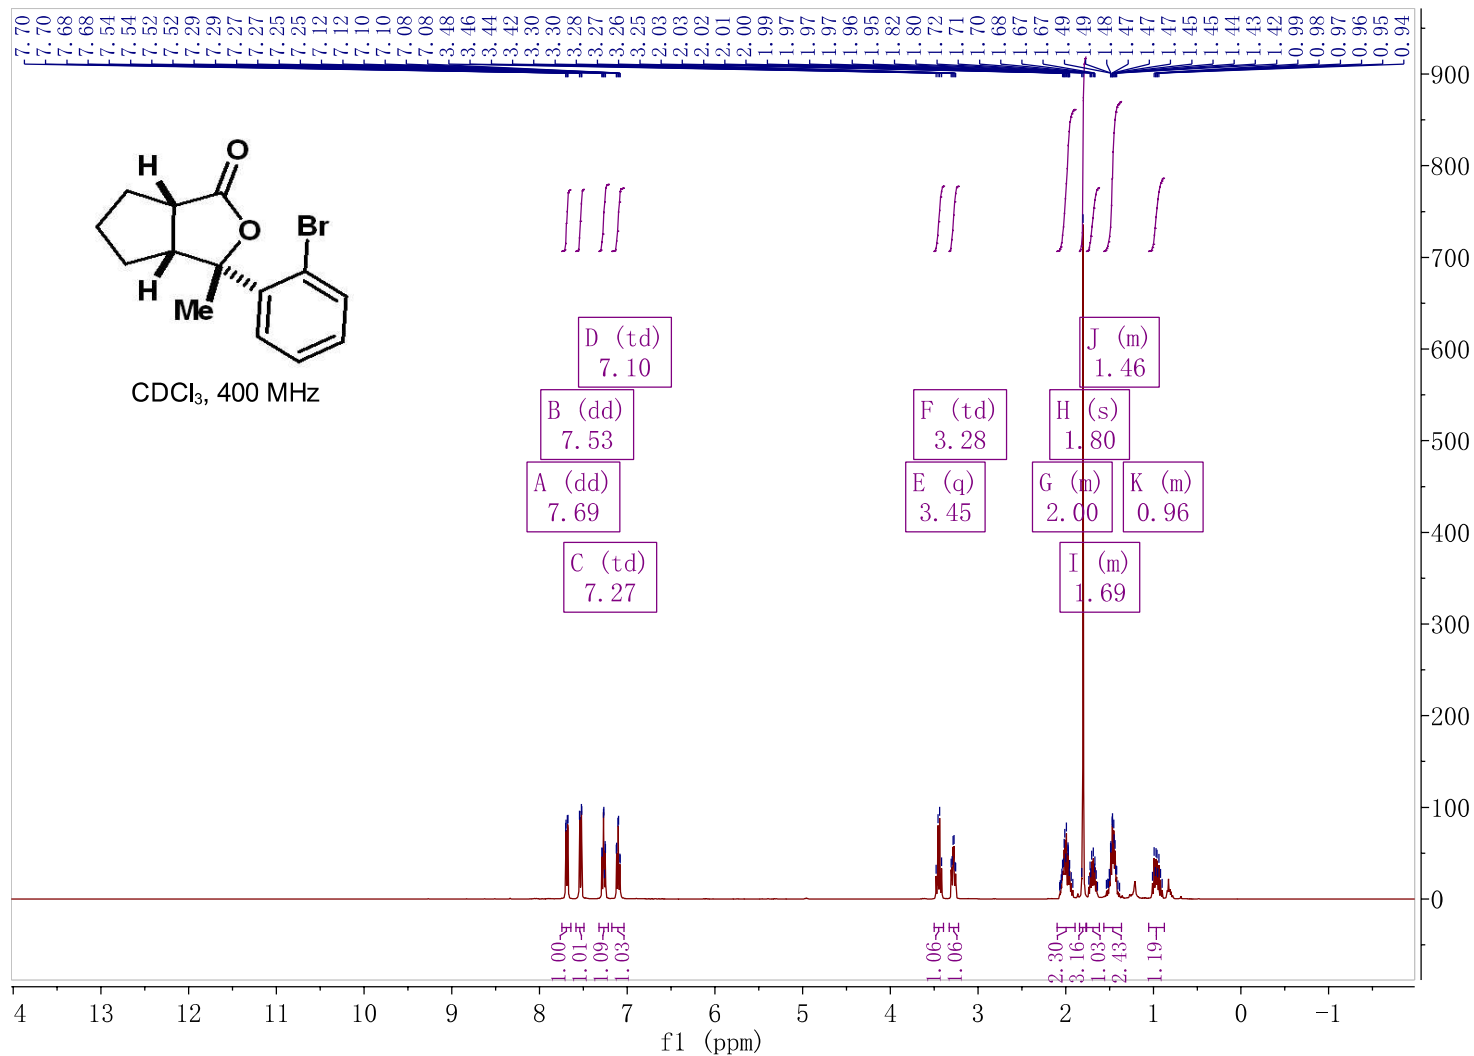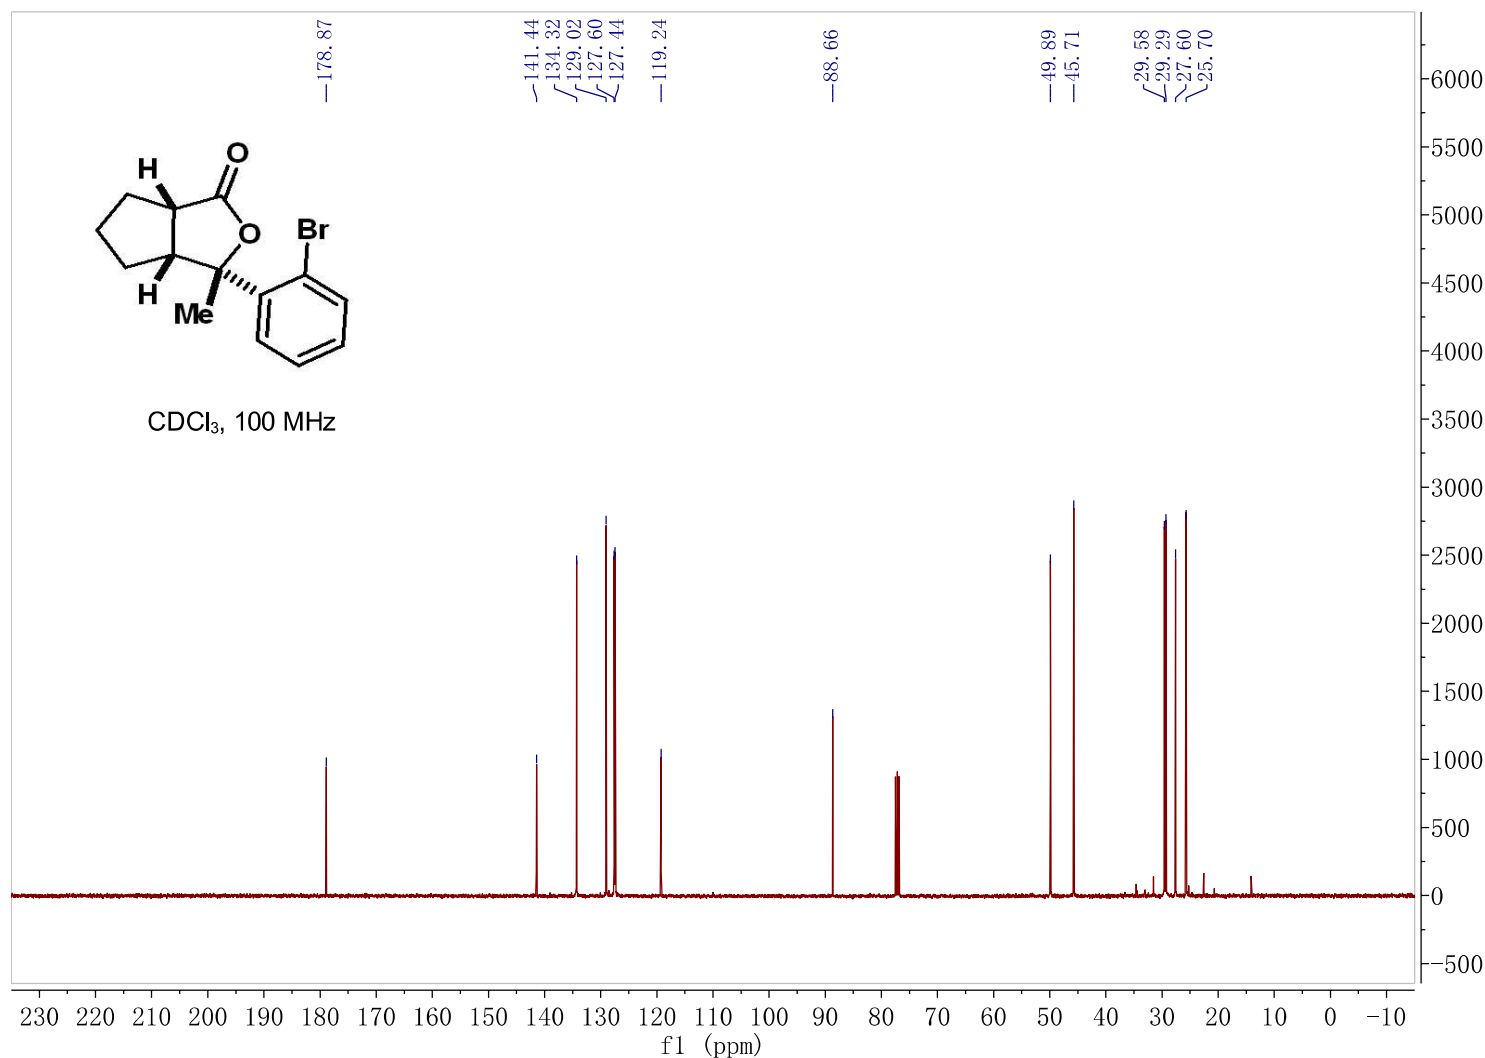

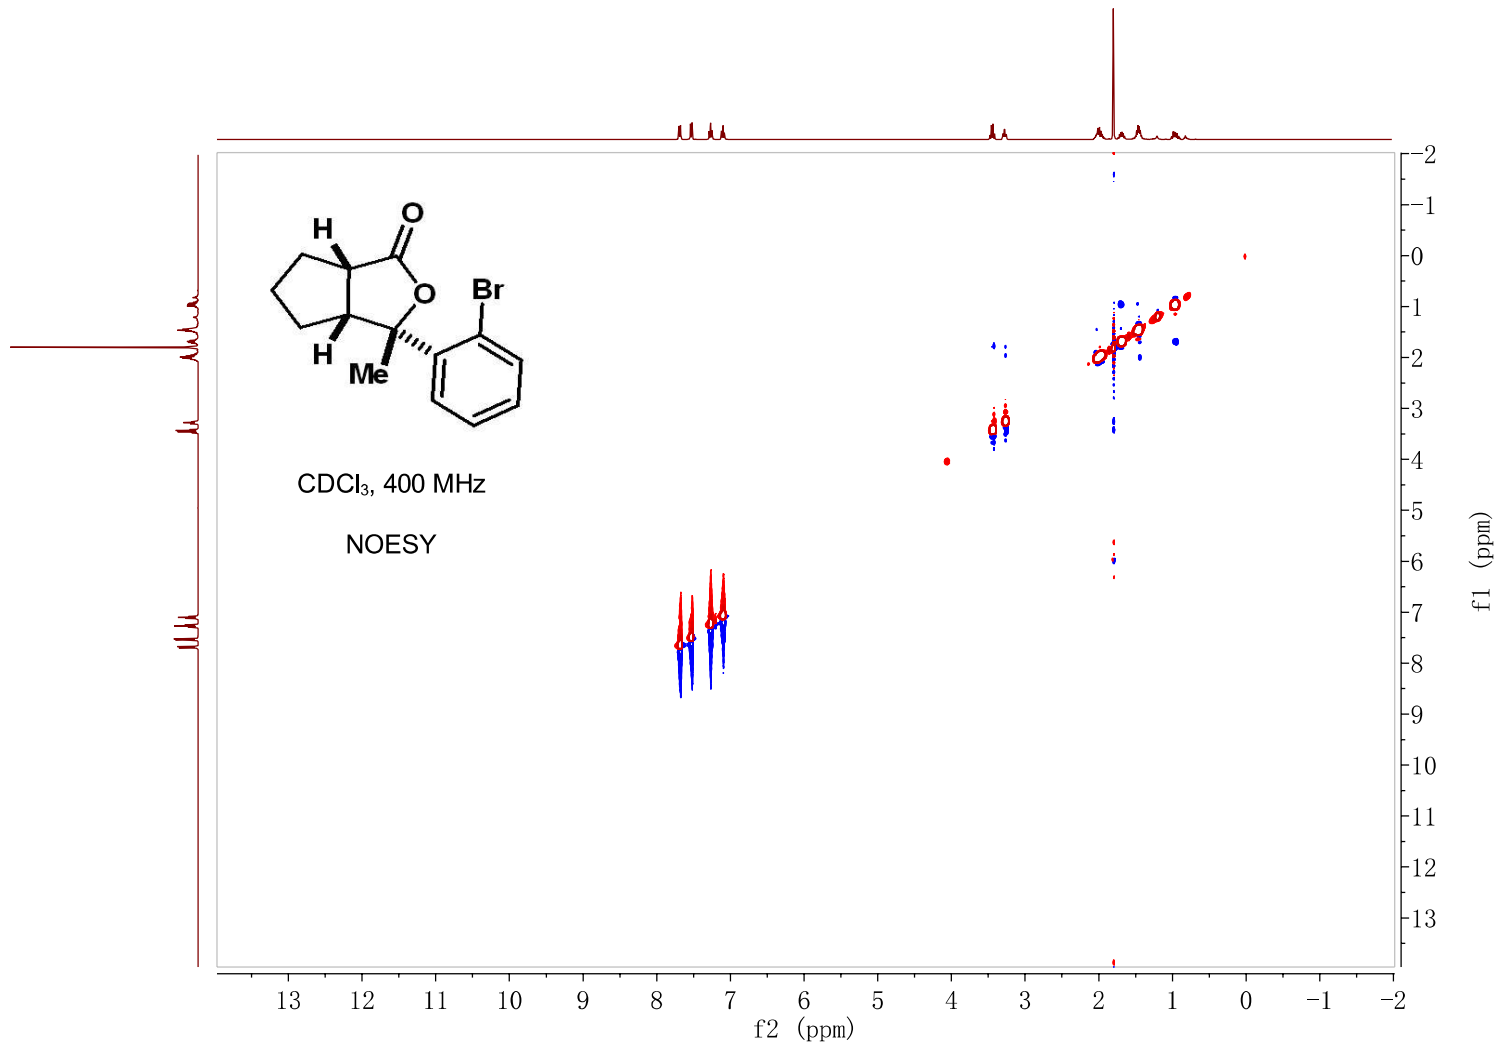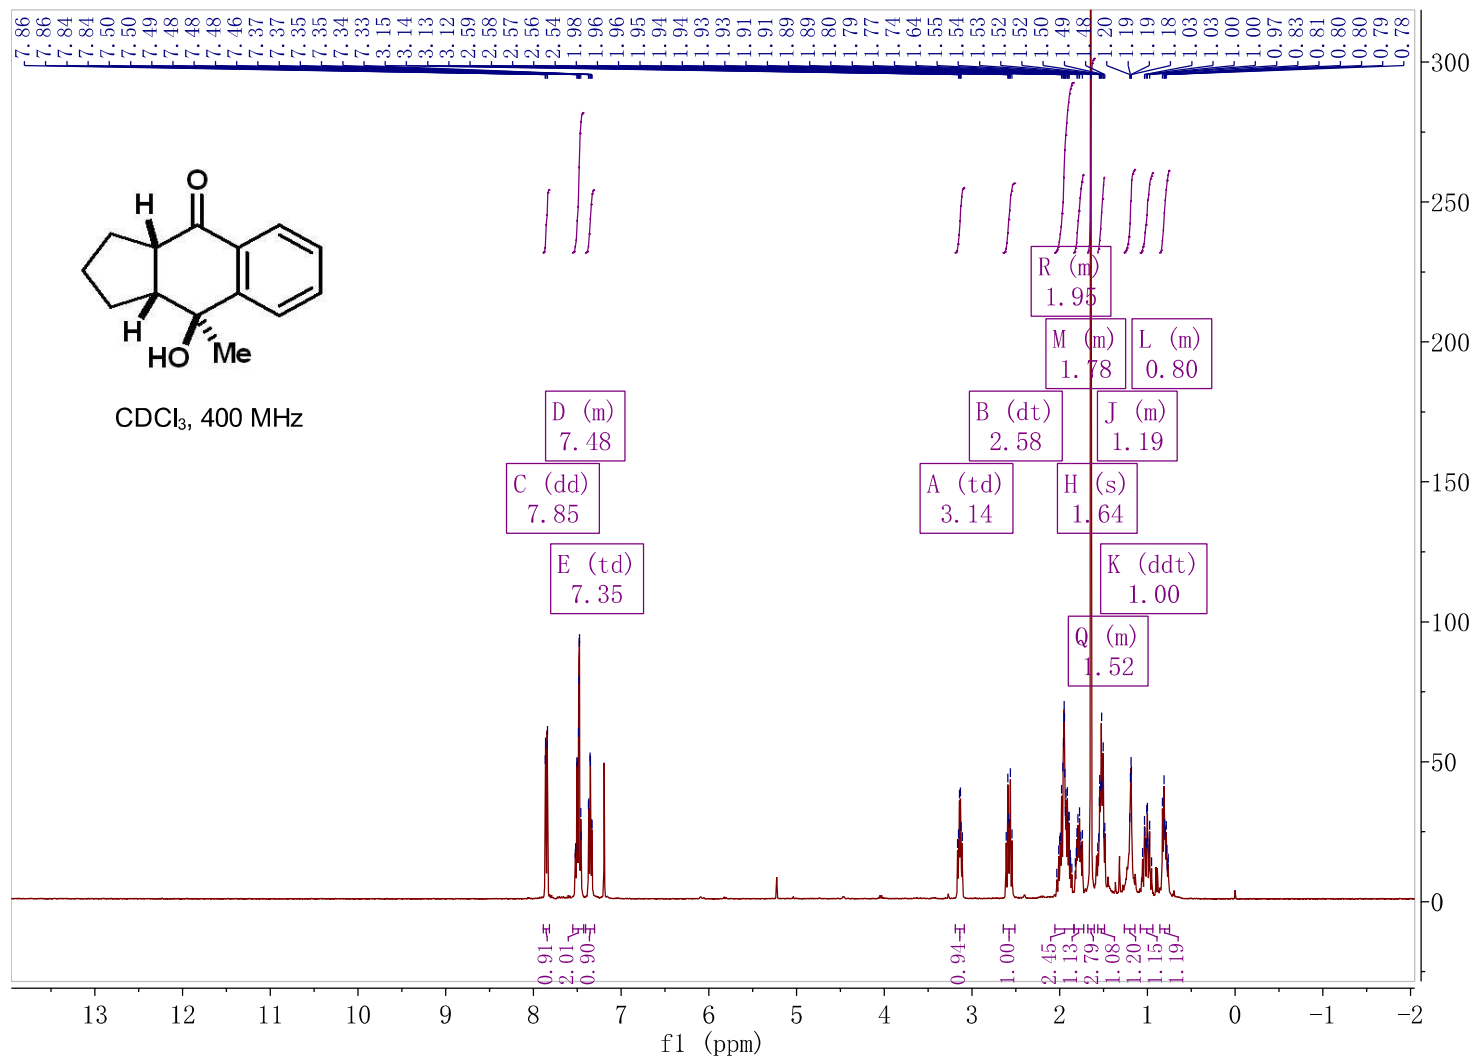

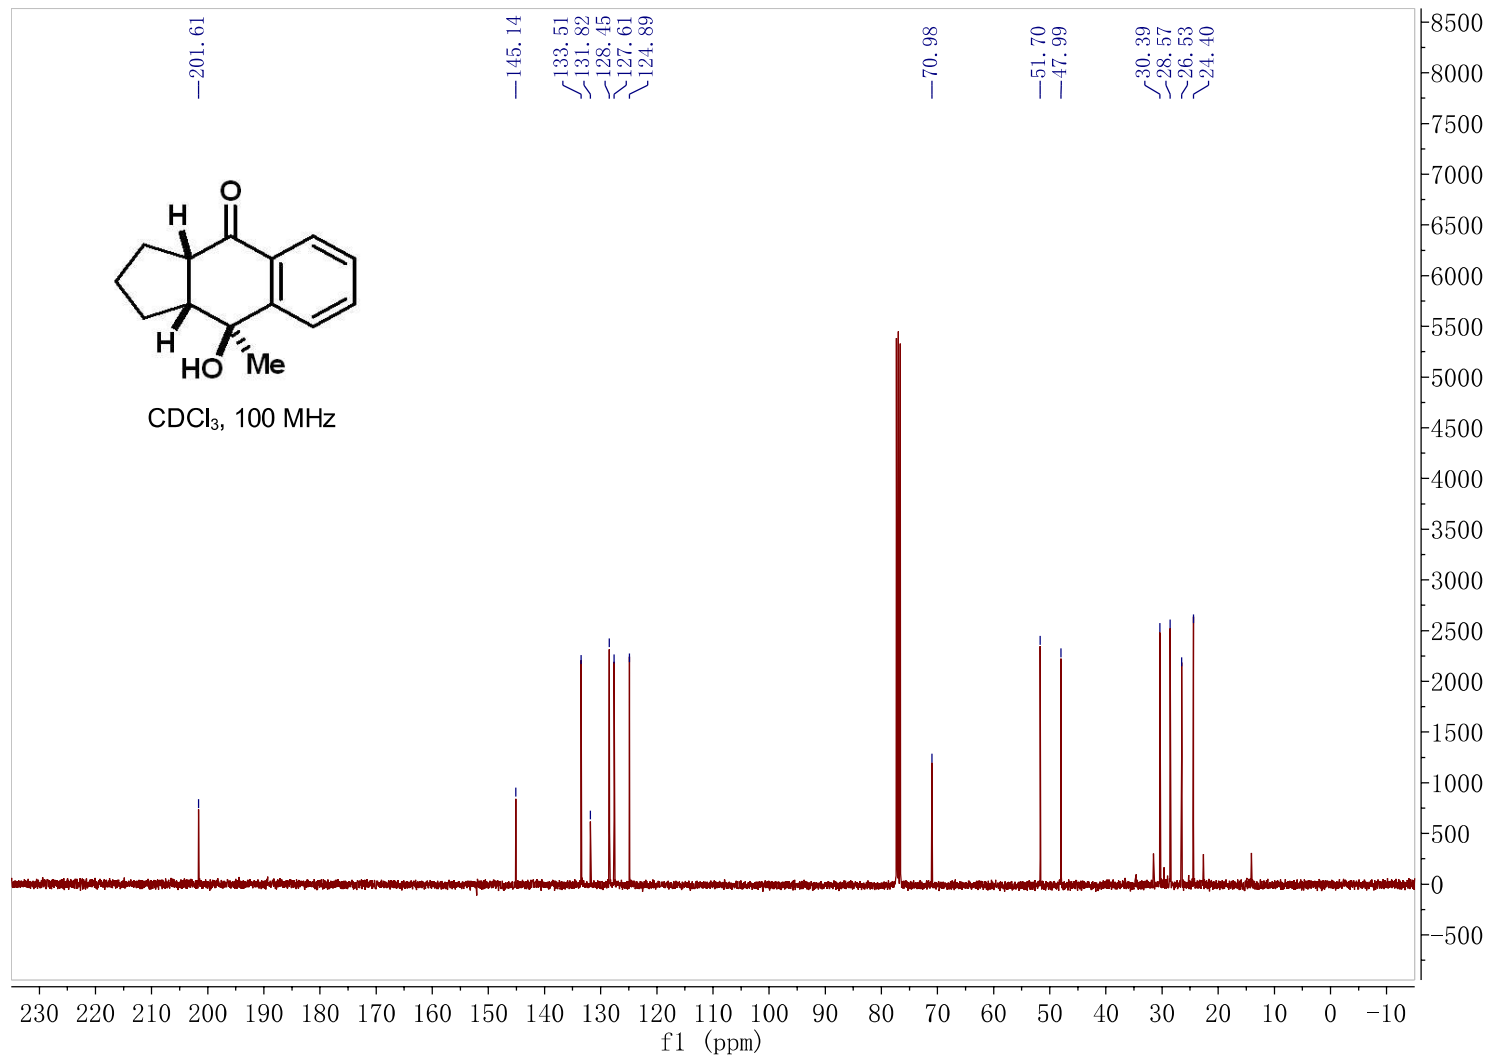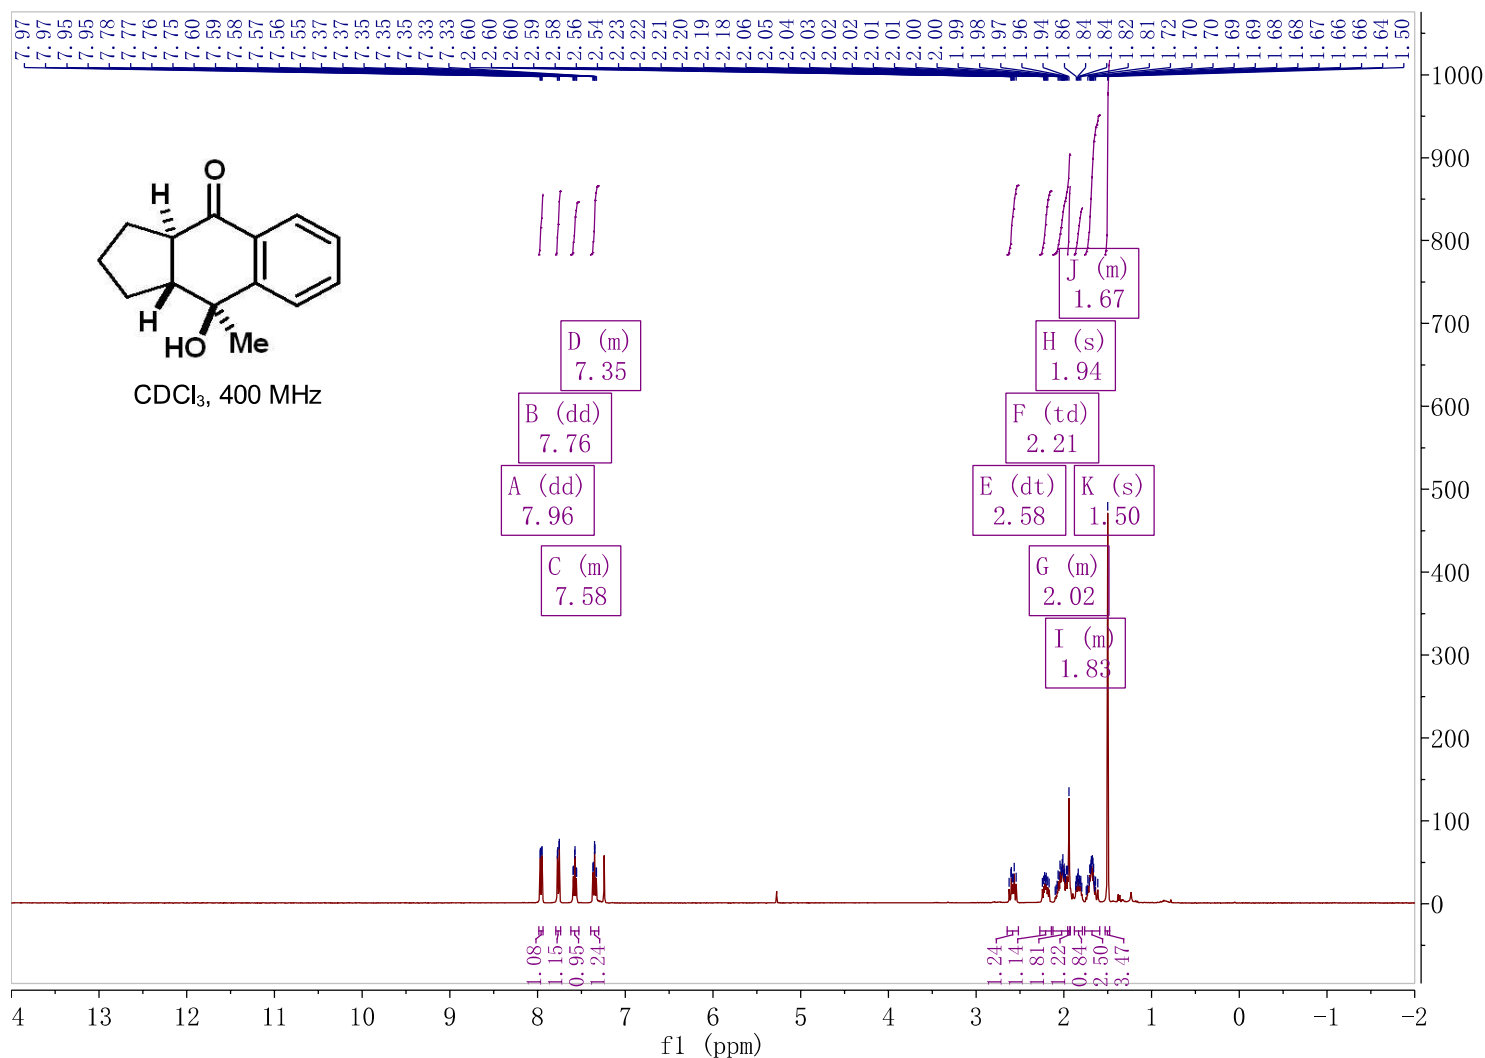



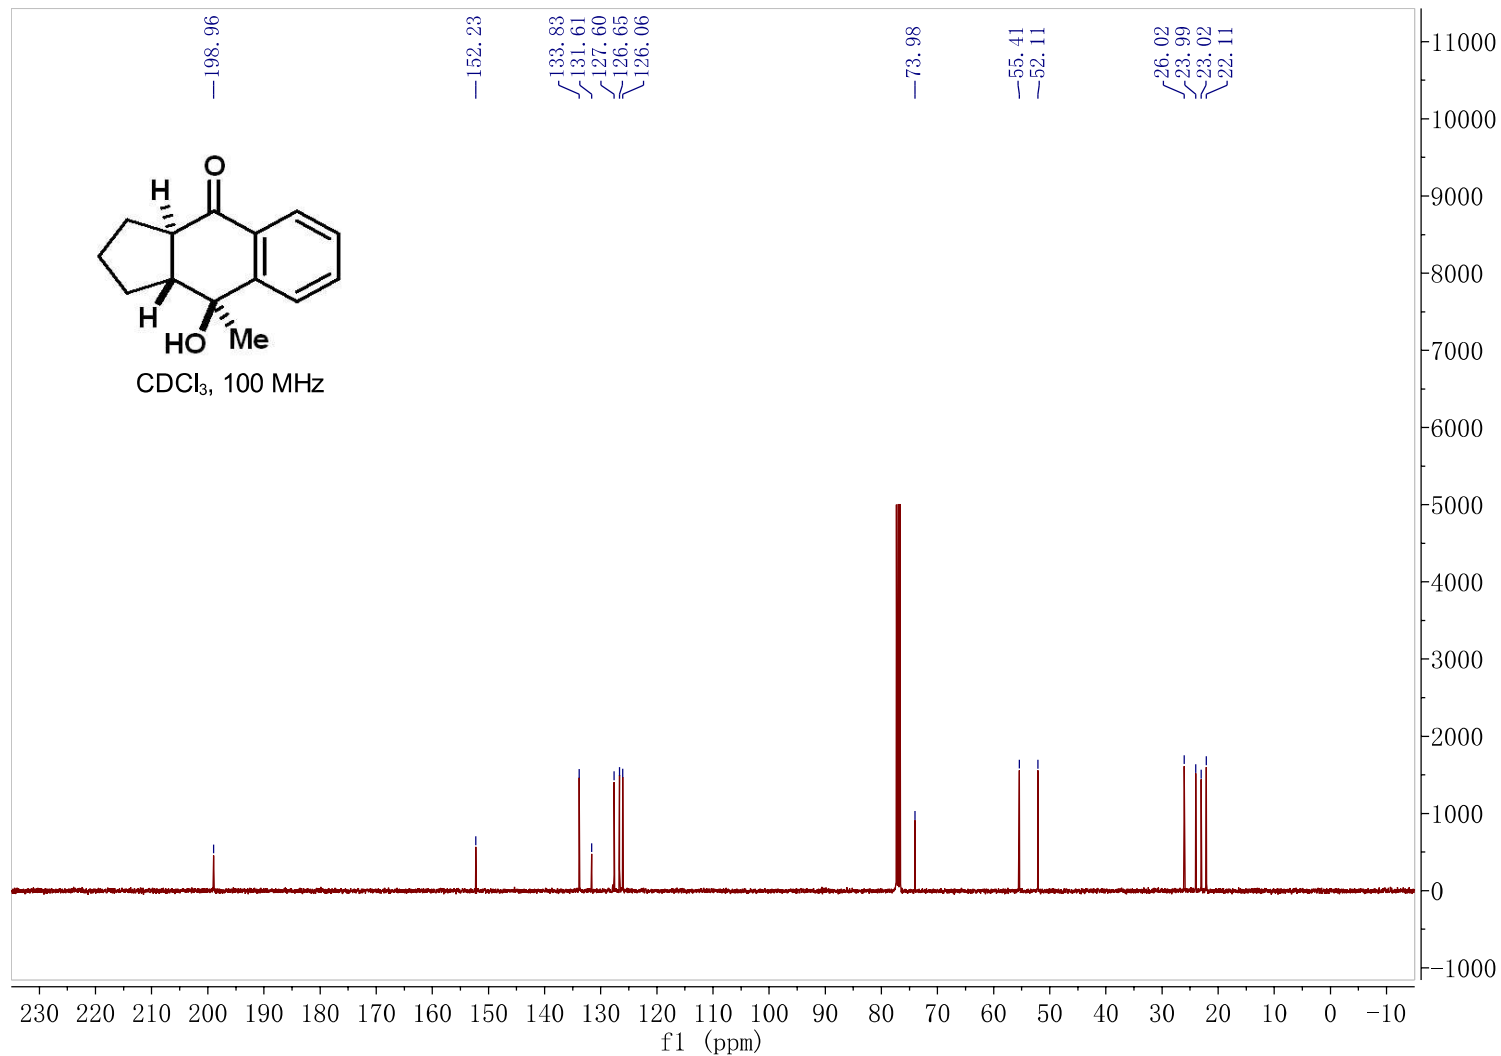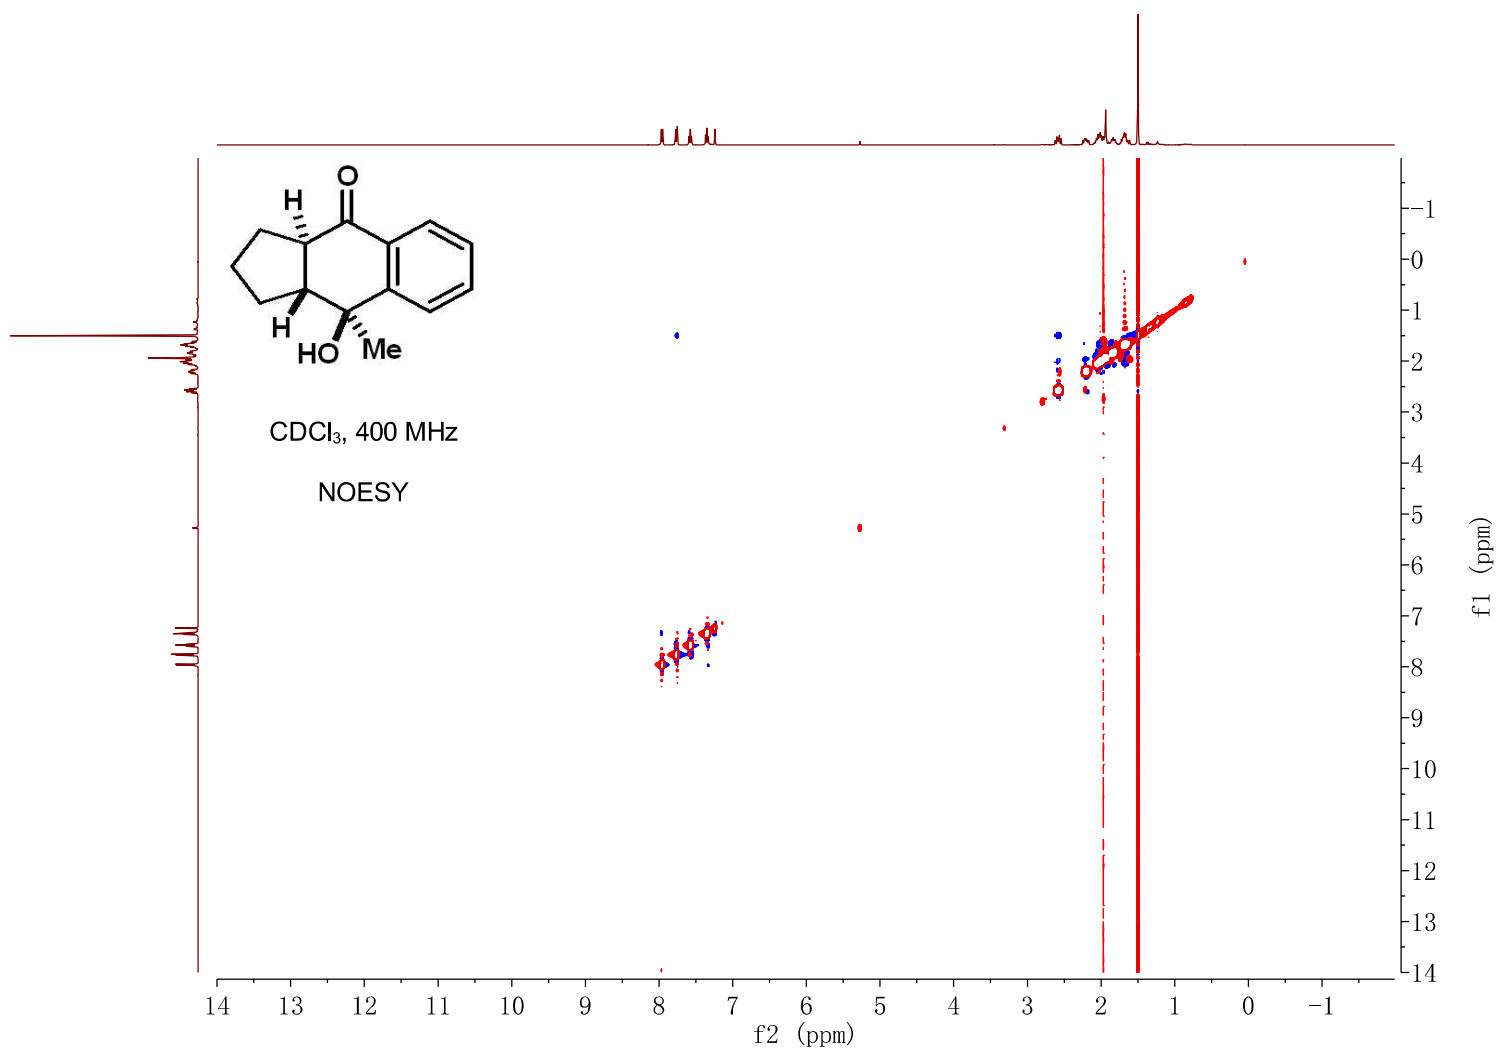

Supplement: c5ob01837d2.pdf [file c5ob01837d2.pdf]
